# Supplementary material for: Cross-species insemination reveals mouse sperm ability to enter and cross the fish micropyle
Source: eLife. 2025 Oct 16;14:RP106303. doi: 10.7554/eLife.106303 (PMC12530800; doi:10.7554/eLife.106303)
Supplement: Source data 1. [file elife-106303-data1.xlsx]

## Sheet: Fig_1D
Replicate	Bead	Sperm/bead
Repl01	mZP2	7
Repl01	mZP2	7
Repl01	mZP2	8
Repl01	mZP2	7
Repl01	mZP2	5
Repl01	mZP2	4
Repl01	mZP2	3
Repl01	mZP2	6
Repl01	mZP2	7
Repl01	mZP2	7
Repl01	mZP2	7
Repl01	mZP2	8
Repl01	mZP2	9
Repl01	mZP2	8
Repl01	mZP2	7
Repl01	mZP2	6
Repl02	mZP2	6
Repl02	mZP2	7
Repl02	mZP2	7
Repl02	mZP2	7
Repl02	mZP2	7
Repl02	mZP2	7
Repl02	mZP2	6
Repl02	mZP2	6
Repl02	mZP2	6
Repl02	mZP2	6
Repl02	mZP2	4
Repl02	mZP2	3
Repl02	mZP2	7
Repl02	mZP2	7
Repl02	mZP2	7
Repl02	mZP2	8
Repl02	mZP2	9
Repl03	mZP2	9
Repl03	mZP2	10
Repl03	mZP2	1
Repl03	mZP2	7
Repl03	mZP2	7
Repl03	mZP2	6
Repl03	mZP2	7
Repl03	mZP2	7
Repl03	mZP2	8
Repl03	mZP2	5
Repl03	mZP2	6
Repl03	mZP2	6
Repl03	mZP2	6
Repl03	mZP2	6
Repl03	mZP2	7
Repl03	mZP2	7
Repl03	mZP2	8
Repl01	ZFZP2	0
Repl01	ZFZP2	2
Repl01	ZFZP2	0
Repl01	ZFZP2	0
Repl01	ZFZP2	2
Repl01	ZFZP2	0
Repl01	ZFZP2	0
Repl01	ZFZP2	2
Repl01	ZFZP2	0
Repl01	ZFZP2	0
Repl01	ZFZP2	2
Repl01	ZFZP2	0
Repl01	ZFZP2	0
Repl01	ZFZP2	0
Repl01	ZFZP2	2
Repl01	ZFZP2	0
Repl02	ZFZP2	0
Repl02	ZFZP2	1
Repl02	ZFZP2	0
Repl02	ZFZP2	0
Repl02	ZFZP2	1
Repl02	ZFZP2	0
Repl02	ZFZP2	0
Repl02	ZFZP2	1
Repl02	ZFZP2	0
Repl02	ZFZP2	0
Repl02	ZFZP2	0
Repl02	ZFZP2	1
Repl02	ZFZP2	0
Repl02	ZFZP2	1
Repl02	ZFZP2	0
Repl02	ZFZP2	0
Repl02	ZFZP2	2
Repl03	ZFZP2	0
Repl03	ZFZP2	1
Repl03	ZFZP2	0
Repl03	ZFZP2	0
Repl03	ZFZP2	1
Repl03	ZFZP2	0
Repl03	ZFZP2	1
Repl03	ZFZP2	0
Repl03	ZFZP2	0
Repl03	ZFZP2	0
Repl03	ZFZP2	0
Repl03	ZFZP2	1
Repl03	ZFZP2	0
Repl03	ZFZP2	1
Repl03	ZFZP2	0
Repl03	ZFZP2	0
Repl03	ZFZP2	1
Repl03	ZFZP2	0
Repl03	ZFZP2	0
Repl01	ZFZP3	1
Repl01	ZFZP3	0
Repl01	ZFZP3	0
Repl01	ZFZP3	1
Repl01	ZFZP3	0
Repl01	ZFZP3	0
Repl01	ZFZP3	1
Repl01	ZFZP3	0
Repl01	ZFZP3	0
Repl01	ZFZP3	2
Repl01	ZFZP3	0
Repl01	ZFZP3	0
Repl01	ZFZP3	1
Repl01	ZFZP3	0
Repl01	ZFZP3	0
Repl01	ZFZP3	0
Repl02	ZFZP3	2
Repl02	ZFZP3	0
Repl02	ZFZP3	0
Repl02	ZFZP3	3
Repl02	ZFZP3	0
Repl02	ZFZP3	1
Repl02	ZFZP3	0
Repl02	ZFZP3	0
Repl02	ZFZP3	0
Repl02	ZFZP3	1
Repl02	ZFZP3	0
Repl02	ZFZP3	0
Repl02	ZFZP3	1
Repl02	ZFZP3	1
Repl02	ZFZP3	0
Repl02	ZFZP3	0
Repl02	ZFZP3	1
Repl03	ZFZP3	0
Repl03	ZFZP3	0
Repl03	ZFZP3	0
Repl03	ZFZP3	0
Repl03	ZFZP3	0
Repl03	ZFZP3	1
Repl03	ZFZP3	0
Repl03	ZFZP3	1
Repl03	ZFZP3	0
Repl03	ZFZP3	1
Repl03	ZFZP3	0
Repl03	ZFZP3	1
Repl03	ZFZP3	0
Repl03	ZFZP3	1
Repl03	ZFZP3	0
Repl03	ZFZP3	0
Repl03	ZFZP3	0
Repl03	ZFZP3	0
Repl01	ZFZP2ZP3	0
Repl01	ZFZP2ZP3	2
Repl01	ZFZP2ZP3	0
Repl01	ZFZP2ZP3	0
Repl01	ZFZP2ZP3	1
Repl01	ZFZP2ZP3	1
Repl01	ZFZP2ZP3	0
Repl01	ZFZP2ZP3	1
Repl01	ZFZP2ZP3	0
Repl01	ZFZP2ZP3	0
Repl01	ZFZP2ZP3	1
Repl01	ZFZP2ZP3	0
Repl01	ZFZP2ZP3	0
Repl01	ZFZP2ZP3	3
Repl01	ZFZP2ZP3	0
Repl01	ZFZP2ZP3	1
Repl02	ZFZP2ZP3	0
Repl02	ZFZP2ZP3	0
Repl02	ZFZP2ZP3	1
Repl02	ZFZP2ZP3	0
Repl02	ZFZP2ZP3	1
Repl02	ZFZP2ZP3	0
Repl02	ZFZP2ZP3	0
Repl02	ZFZP2ZP3	1
Repl02	ZFZP2ZP3	0
Repl02	ZFZP2ZP3	0
Repl02	ZFZP2ZP3	1
Repl02	ZFZP2ZP3	0
Repl02	ZFZP2ZP3	0
Repl02	ZFZP2ZP3	0
Repl02	ZFZP2ZP3	1
Repl02	ZFZP2ZP3	0
Repl02	ZFZP2ZP3	0
Repl03	ZFZP2ZP3	1
Repl03	ZFZP2ZP3	0
Repl03	ZFZP2ZP3	1
Repl03	ZFZP2ZP3	0
Repl03	ZFZP2ZP3	0
Repl03	ZFZP2ZP3	1
Repl03	ZFZP2ZP3	0
Repl03	ZFZP2ZP3	1
Repl03	ZFZP2ZP3	0
Repl03	ZFZP2ZP3	0
Repl03	ZFZP2ZP3	1
Repl03	ZFZP2ZP3	4
Repl03	ZFZP2ZP3	0
Repl03	ZFZP2ZP3	0
Repl03	ZFZP2ZP3	1
Repl03	ZFZP2ZP3	0
Repl01	Cntrl	0
Repl01	Cntrl	0
Repl01	Cntrl	0
Repl01	Cntrl	2
Repl01	Cntrl	0
Repl01	Cntrl	0
Repl01	Cntrl	0
Repl01	Cntrl	1
Repl01	Cntrl	0
Repl01	Cntrl	0
Repl01	Cntrl	0
Repl01	Cntrl	0
Repl01	Cntrl	1
Repl01	Cntrl	0
Repl01	Cntrl	0
Repl01	Cntrl	0
Repl02	Cntrl	1
Repl02	Cntrl	0
Repl02	Cntrl	0
Repl02	Cntrl	2
Repl02	Cntrl	0
Repl02	Cntrl	0
Repl02	Cntrl	0
Repl02	Cntrl	1
Repl02	Cntrl	0
Repl02	Cntrl	1
Repl02	Cntrl	0
Repl02	Cntrl	0
Repl02	Cntrl	1
Repl02	Cntrl	0
Repl02	Cntrl	1
Repl02	Cntrl	0
Repl02	Cntrl	1
Repl03	Cntrl	0
Repl03	Cntrl	0
Repl03	Cntrl	0
Repl03	Cntrl	1
Repl03	Cntrl	0
Repl03	Cntrl	1
Repl03	Cntrl	0
Repl03	Cntrl	1
Repl03	Cntrl	0
Repl03	Cntrl	0
Repl03	Cntrl	1
Repl03	Cntrl	0
Repl03	Cntrl	1
Repl03	Cntrl	1
Repl03	Cntrl	0
Repl03	Cntrl	0
Repl03	Cntrl	1
Repl03	Cntrl	1

## Sheet: Fig_1G
Replicate	Sample	Sperm/20um area
Repl01	MoEgg	2
Repl01	MoEgg	2
Repl01	MoEgg	5
Repl01	MoEgg	2
Repl01	MoEgg	5
Repl01	MoEgg	6
Repl01	MoEgg	6
Repl01	MoEgg	0
Repl01	MoEgg	0
Repl01	MoEgg	0
Repl01	MoEgg	0
Repl01	MoEgg	8
Repl01	MoEgg	3
Repl01	MoEgg	0
Repl01	MoEgg	0
Repl01	MoEgg	0
Repl01	MoEgg	0
Repl01	MoEgg	5
Repl01	MoEgg	4
Repl01	MoEgg	0
Repl01	MoEgg	1
Repl01	MoEgg	0
Repl01	MoEgg	1
Repl01	MoEgg	3
Repl01	MoEgg	3
Repl01	MoEgg	0
Repl01	MoEgg	0
Repl01	MoEgg	0
Repl01	MoEgg	1
Repl01	MoEgg	0
Repl01	MoEgg	1
Repl01	MoEgg	3
Repl01	MoEgg	8
Repl01	MoEgg	3
Repl01	MoEgg	4
Repl01	MoEgg	1
Repl01	MoEgg	0
Repl01	MoEgg	0
Repl01	MoEgg	1
Repl01	MoEgg	0
Repl01	MoEgg	1
Repl01	MoEgg	0
Repl01	MoEgg	0
Repl01	MoEgg	0
Repl01	MoEgg	0
Repl01	MoEgg	0
Repl01	MoEgg	0
Repl01	MoEgg	0
Repl01	MoEgg	0
Repl01	MoEgg	0
Repl01	MoEgg	0
Repl01	MoEgg	0
Repl01	MoEgg	0
Repl01	MoEgg	0
Repl01	MoEgg	1
Repl01	MoEgg	0
Repl01	MoEgg	0
Repl01	MoEgg	0
Repl01	MoEgg	2
Repl01	MoEgg	1
Repl01	MoEgg	0
Repl01	MoEgg	0
Repl01	MoEgg	0
Repl01	MoEgg	0
Repl01	MoEgg	2
Repl01	MoEgg	0
Repl01	MoEgg	0
Repl01	MoEgg	0
Repl01	MoEgg	1
Repl01	MoEgg	3
Repl01	MoEgg	0
Repl01	MoEgg	0
Repl01	MoEgg	0
Repl01	MoEgg	0
Repl01	MoEgg	0
Repl01	MoEgg	0
Repl01	MoEgg	0
Repl01	MoEgg	0
Repl01	MoEgg	0
Repl01	MoEgg	0
Repl01	MoEgg	0
Repl01	MoEgg	0
Repl01	MoEgg	0
Repl01	MoEgg	3
Repl01	MoEgg	0
Repl01	MoEgg	0
Repl01	MoEgg	0
Repl01	MoEgg	0
Repl01	MoEgg	0
Repl01	MoEgg	1
Repl01	MoEgg	0
Repl01	MoEgg	0
Repl01	MoEgg	0
Repl01	MoEgg	0
Repl01	MoEgg	0
Repl01	MoEgg	0
Repl01	MoEgg	1
Repl01	MoEgg	0
Repl01	MoEgg	0
Repl01	MoEgg	0
Repl01	MoEgg	0
Repl01	MoEgg	0
Repl01	MoEgg	0
Repl01	MoEgg	0
Repl01	MoEgg	0
Repl01	MoEgg	1
Repl01	MoEgg	2
Repl01	MoEgg	0
Repl01	MoEgg	0
Repl01	MoEgg	0
Repl01	MoEgg	0
Repl01	MoEgg	1
Repl01	MoEgg	0
Repl01	MoEgg	0
Repl01	MoEgg	0
Repl01	MoEgg	0
Repl01	MoEgg	0
Repl01	MoEgg	0
Repl01	MoEgg	0
Repl01	MoEgg	0
Repl01	MoEgg	0
Repl01	MoEgg	0
Repl01	MoEgg	0
Repl01	MoEgg	0
Repl01	MoEgg	0
Repl01	MoEgg	1
Repl01	MoEgg	0
Repl01	MoEgg	0
Repl01	MoEgg	0
Repl01	MoEgg	0
Repl01	MoEgg	0
Repl01	MoEgg	0
Repl01	MoEgg	0
Repl01	MoEgg	0
Repl01	MoEgg	0
Repl01	MoEgg	0
Repl01	MoEgg	0
Repl01	MoEgg	0
Repl01	MoEgg	0
Repl01	MoEgg	1
Repl01	MoEgg	1
Repl01	MoEgg	0
Repl01	MoEgg	1
Repl01	MoEgg	2
Repl01	MoEgg	1
Repl01	MoEgg	0
Repl01	MoEgg	1
Repl01	MoEgg	1
Repl01	MoEgg	4
Repl01	MoEgg	0
Repl01	MoEgg	3
Repl01	MoEgg	1
Repl01	MoEgg	0
Repl01	MoEgg	0
Repl01	MoEgg	1
Repl01	MoEgg	2
Repl01	MoEgg	1
Repl01	MoEgg	0
Repl01	MoEgg	0
Repl01	MoEgg	0
Repl01	MoEgg	0
Repl01	MoEgg	2
Repl01	MoEgg	1
Repl01	MoEgg	0
Repl01	MoEgg	0
Repl01	MoEgg	0
Repl01	MoEgg	1
Repl01	MoEgg	2
Repl01	MoEgg	0
Repl01	MoEgg	0
Repl01	MoEgg	0
Repl01	MoEgg	0
Repl01	MoEgg	1
Repl01	MoEgg	2
Repl01	MoEgg	0
Repl01	MoEgg	0
Repl01	MoEgg	0
Repl01	MoEgg	1
Repl01	MoEgg	1
Repl01	MoEgg	2
Repl01	MoEgg	0
Repl01	MoEgg	3
Repl01	MoEgg	1
Repl01	MoEgg	1
Repl01	MoEgg	1
Repl01	MoEgg	1
Repl01	MoEgg	5
Repl01	MoEgg	0
Repl01	MoEgg	2
Repl02	MoEgg	0
Repl02	MoEgg	0
Repl02	MoEgg	4
Repl02	MoEgg	0
Repl02	MoEgg	0
Repl02	MoEgg	0
Repl02	MoEgg	0
Repl02	MoEgg	1
Repl02	MoEgg	3
Repl02	MoEgg	1
Repl02	MoEgg	1
Repl02	MoEgg	0
Repl02	MoEgg	0
Repl02	MoEgg	0
Repl02	MoEgg	2
Repl02	MoEgg	5
Repl02	MoEgg	3
Repl02	MoEgg	0
Repl02	MoEgg	0
Repl02	MoEgg	1
Repl02	MoEgg	3
Repl02	MoEgg	0
Repl02	MoEgg	0
Repl02	MoEgg	2
Repl02	MoEgg	1
Repl02	MoEgg	3
Repl02	MoEgg	1
Repl02	MoEgg	0
Repl02	MoEgg	2
Repl02	MoEgg	5
Repl02	MoEgg	3
Repl02	MoEgg	3
Repl02	MoEgg	0
Repl02	MoEgg	0
Repl02	MoEgg	0
Repl02	MoEgg	0
Repl02	MoEgg	0
Repl02	MoEgg	0
Repl02	MoEgg	0
Repl02	MoEgg	1
Repl02	MoEgg	1
Repl02	MoEgg	0
Repl02	MoEgg	0
Repl02	MoEgg	0
Repl02	MoEgg	5
Repl02	MoEgg	0
Repl02	MoEgg	1
Repl02	MoEgg	0
Repl02	MoEgg	0
Repl02	MoEgg	0
Repl02	MoEgg	1
Repl02	MoEgg	1
Repl02	MoEgg	0
Repl02	MoEgg	0
Repl02	MoEgg	0
Repl02	MoEgg	0
Repl02	MoEgg	2
Repl02	MoEgg	3
Repl02	MoEgg	1
Repl02	MoEgg	0
Repl02	MoEgg	3
Repl02	MoEgg	1
Repl02	MoEgg	3
Repl02	MoEgg	0
Repl02	MoEgg	1
Repl02	MoEgg	0
Repl02	MoEgg	1
Repl02	MoEgg	0
Repl02	MoEgg	0
Repl02	MoEgg	0
Repl02	MoEgg	0
Repl02	MoEgg	1
Repl02	MoEgg	2
Repl02	MoEgg	2
Repl02	MoEgg	1
Repl02	MoEgg	1
Repl02	MoEgg	0
Repl02	MoEgg	1
Repl02	MoEgg	1
Repl02	MoEgg	0
Repl02	MoEgg	0
Repl02	MoEgg	4
Repl02	MoEgg	1
Repl02	MoEgg	0
Repl02	MoEgg	0
Repl02	MoEgg	1
Repl02	MoEgg	3
Repl02	MoEgg	2
Repl02	MoEgg	1
Repl02	MoEgg	0
Repl02	MoEgg	0
Repl02	MoEgg	0
Repl02	MoEgg	2
Repl02	MoEgg	1
Repl02	MoEgg	5
Repl02	MoEgg	3
Repl02	MoEgg	0
Repl02	MoEgg	2
Repl02	MoEgg	0
Repl02	MoEgg	0
Repl02	MoEgg	0
Repl02	MoEgg	0
Repl02	MoEgg	0
Repl02	MoEgg	0
Repl02	MoEgg	0
Repl02	MoEgg	1
Repl02	MoEgg	0
Repl02	MoEgg	0
Repl02	MoEgg	0
Repl02	MoEgg	0
Repl02	MoEgg	0
Repl02	MoEgg	1
Repl02	MoEgg	0
Repl02	MoEgg	0
Repl02	MoEgg	0
Repl02	MoEgg	0
Repl02	MoEgg	0
Repl02	MoEgg	0
Repl02	MoEgg	0
Repl02	MoEgg	0
Repl02	MoEgg	0
Repl02	MoEgg	0
Repl02	MoEgg	1
Repl02	MoEgg	1
Repl02	MoEgg	1
Repl02	MoEgg	0
Repl02	MoEgg	0
Repl02	MoEgg	0
Repl02	MoEgg	2
Repl02	MoEgg	0
Repl02	MoEgg	0
Repl02	MoEgg	0
Repl02	MoEgg	1
Repl02	MoEgg	0
Repl02	MoEgg	0
Repl02	MoEgg	0
Repl02	MoEgg	0
Repl02	MoEgg	1
Repl02	MoEgg	0
Repl02	MoEgg	0
Repl02	MoEgg	0
Repl02	MoEgg	1
Repl02	MoEgg	1
Repl02	MoEgg	0
Repl02	MoEgg	0
Repl02	MoEgg	0
Repl02	MoEgg	0
Repl02	MoEgg	2
Repl02	MoEgg	0
Repl02	MoEgg	0
Repl02	MoEgg	0
Repl02	MoEgg	0
Repl02	MoEgg	1
Repl02	MoEgg	0
Repl02	MoEgg	0
Repl02	MoEgg	0
Repl02	MoEgg	0
Repl02	MoEgg	0
Repl02	MoEgg	1
Repl02	MoEgg	2
Repl02	MoEgg	1
Repl02	MoEgg	1
Repl02	MoEgg	1
Repl02	MoEgg	0
Repl02	MoEgg	0
Repl02	MoEgg	0
Repl02	MoEgg	0
Repl02	MoEgg	0
Repl02	MoEgg	0
Repl02	MoEgg	0
Repl02	MoEgg	2
Repl02	MoEgg	0
Repl02	MoEgg	3
Repl02	MoEgg	0
Repl02	MoEgg	0
Repl02	MoEgg	3
Repl02	MoEgg	1
Repl02	MoEgg	1
Repl02	MoEgg	1
Repl02	MoEgg	0
Repl02	MoEgg	0
Repl02	MoEgg	1
Repl02	MoEgg	1
Repl02	MoEgg	0
Repl02	MoEgg	0
Repl02	MoEgg	0
Repl02	MoEgg	0
Repl02	MoEgg	0
Repl02	MoEgg	5
Repl02	MoEgg	2
Repl02	MoEgg	0
Repl03	MoEgg	0
Repl03	MoEgg	0
Repl03	MoEgg	0
Repl03	MoEgg	5
Repl03	MoEgg	4
Repl03	MoEgg	0
Repl03	MoEgg	0
Repl03	MoEgg	1
Repl03	MoEgg	0
Repl03	MoEgg	1
Repl03	MoEgg	0
Repl03	MoEgg	0
Repl03	MoEgg	1
Repl03	MoEgg	1
Repl03	MoEgg	2
Repl03	MoEgg	2
Repl03	MoEgg	0
Repl03	MoEgg	0
Repl03	MoEgg	2
Repl03	MoEgg	0
Repl03	MoEgg	1
Repl03	MoEgg	0
Repl03	MoEgg	2
Repl03	MoEgg	1
Repl03	MoEgg	0
Repl03	MoEgg	0
Repl03	MoEgg	0
Repl03	MoEgg	1
Repl03	MoEgg	0
Repl03	MoEgg	0
Repl03	MoEgg	0
Repl03	MoEgg	0
Repl03	MoEgg	0
Repl03	MoEgg	4
Repl03	MoEgg	1
Repl03	MoEgg	0
Repl03	MoEgg	0
Repl03	MoEgg	0
Repl03	MoEgg	0
Repl03	MoEgg	2
Repl03	MoEgg	1
Repl03	MoEgg	0
Repl03	MoEgg	1
Repl03	MoEgg	0
Repl03	MoEgg	2
Repl03	MoEgg	0
Repl03	MoEgg	1
Repl03	MoEgg	0
Repl03	MoEgg	3
Repl03	MoEgg	2
Repl03	MoEgg	2
Repl03	MoEgg	0
Repl03	MoEgg	0
Repl03	MoEgg	0
Repl03	MoEgg	0
Repl03	MoEgg	0
Repl03	MoEgg	0
Repl03	MoEgg	0
Repl03	MoEgg	0
Repl03	MoEgg	0
Repl03	MoEgg	0
Repl03	MoEgg	0
Repl03	MoEgg	1
Repl03	MoEgg	1
Repl03	MoEgg	0
Repl03	MoEgg	0
Repl03	MoEgg	0
Repl03	MoEgg	0
Repl03	MoEgg	1
Repl03	MoEgg	0
Repl03	MoEgg	0
Repl03	MoEgg	0
Repl03	MoEgg	1
Repl03	MoEgg	1
Repl03	MoEgg	0
Repl03	MoEgg	1
Repl03	MoEgg	0
Repl03	MoEgg	0
Repl03	MoEgg	0
Repl03	MoEgg	0
Repl03	MoEgg	0
Repl03	MoEgg	0
Repl03	MoEgg	0
Repl03	MoEgg	0
Repl03	MoEgg	0
Repl03	MoEgg	0
Repl03	MoEgg	0
Repl03	MoEgg	0
Repl03	MoEgg	0
Repl03	MoEgg	0
Repl03	MoEgg	1
Repl03	MoEgg	0
Repl03	MoEgg	0
Repl03	MoEgg	0
Repl03	MoEgg	0
Repl03	MoEgg	1
Repl03	MoEgg	0
Repl03	MoEgg	0
Repl03	MoEgg	0
Repl03	MoEgg	0
Repl03	MoEgg	1
Repl03	MoEgg	0
Repl03	MoEgg	0
Repl03	MoEgg	0
Repl03	MoEgg	0
Repl03	MoEgg	0
Repl03	MoEgg	5
Repl03	MoEgg	0
Repl03	MoEgg	0
Repl03	MoEgg	0
Repl03	MoEgg	0
Repl03	MoEgg	2
Repl03	MoEgg	0
Repl03	MoEgg	0
Repl03	MoEgg	0
Repl03	MoEgg	0
Repl03	MoEgg	0
Repl03	MoEgg	0
Repl03	MoEgg	0
Repl03	MoEgg	0
Repl03	MoEgg	0
Repl03	MoEgg	0
Repl03	MoEgg	0
Repl03	MoEgg	0
Repl03	MoEgg	1
Repl03	MoEgg	0
Repl03	MoEgg	1
Repl03	MoEgg	0
Repl03	MoEgg	5
Repl03	MoEgg	5
Repl03	MoEgg	1
Repl03	MoEgg	0
Repl03	MoEgg	0
Repl03	MoEgg	0
Repl03	MoEgg	0
Repl03	MoEgg	0
Repl03	MoEgg	5
Repl03	MoEgg	0
Repl03	MoEgg	0
Repl03	MoEgg	0
Repl03	MoEgg	0
Repl03	MoEgg	1
Repl03	MoEgg	2
Repl03	MoEgg	0
Repl03	MoEgg	0
Repl03	MoEgg	0
Repl03	MoEgg	0
Repl03	MoEgg	3
Repl03	MoEgg	1
Repl03	MoEgg	1
Repl03	MoEgg	0
Repl03	MoEgg	2
Repl03	MoEgg	1
Repl03	MoEgg	2
Repl03	MoEgg	0
Repl03	MoEgg	1
Repl03	MoEgg	1
Repl03	MoEgg	0
Repl03	MoEgg	2
Repl03	MoEgg	1
Repl03	MoEgg	0
Repl03	MoEgg	6
Repl03	MoEgg	2
Repl03	MoEgg	2
Repl03	MoEgg	5
Repl03	MoEgg	0
Repl03	MoEgg	0
Repl03	MoEgg	0
Repl03	MoEgg	0
Repl03	MoEgg	0
Repl03	MoEgg	2
Repl03	MoEgg	1
Repl03	MoEgg	0
Repl03	MoEgg	0
Repl03	MoEgg	0
Repl03	MoEgg	0
Repl03	MoEgg	0
Repl03	MoEgg	7
Repl03	MoEgg	4
Repl03	MoEgg	0
Repl03	MoEgg	0
Repl03	MoEgg	0
Repl03	MoEgg	3
Repl03	MoEgg	3
Repl03	MoEgg	6
Repl03	MoEgg	1
Repl03	MoEgg	0
Repl03	MoEgg	0
Repl03	MoEgg	3
Repl03	MoEgg	4
Repl03	MoEgg	0
Repl03	MoEgg	1
Repl03	MoEgg	1
Repl03	MoEgg	2
Repl03	MoEgg	1
Repl03	MoEgg	0
Repl01	MoTwoCell	0
Repl01	MoTwoCell	0
Repl01	MoTwoCell	0
Repl01	MoTwoCell	0
Repl01	MoTwoCell	0
Repl01	MoTwoCell	0
Repl01	MoTwoCell	0
Repl01	MoTwoCell	0
Repl01	MoTwoCell	0
Repl01	MoTwoCell	0
Repl01	MoTwoCell	0
Repl01	MoTwoCell	0
Repl01	MoTwoCell	1
Repl01	MoTwoCell	0
Repl01	MoTwoCell	0
Repl01	MoTwoCell	0
Repl01	MoTwoCell	0
Repl01	MoTwoCell	0
Repl01	MoTwoCell	0
Repl01	MoTwoCell	0
Repl01	MoTwoCell	0
Repl01	MoTwoCell	0
Repl01	MoTwoCell	0
Repl01	MoTwoCell	0
Repl01	MoTwoCell	0
Repl01	MoTwoCell	0
Repl01	MoTwoCell	0
Repl01	MoTwoCell	0
Repl01	MoTwoCell	0
Repl01	MoTwoCell	0
Repl01	MoTwoCell	1
Repl01	MoTwoCell	0
Repl01	MoTwoCell	0
Repl01	MoTwoCell	0
Repl01	MoTwoCell	0
Repl01	MoTwoCell	0
Repl01	MoTwoCell	0
Repl01	MoTwoCell	0
Repl01	MoTwoCell	0
Repl01	MoTwoCell	0
Repl01	MoTwoCell	0
Repl01	MoTwoCell	0
Repl01	MoTwoCell	0
Repl01	MoTwoCell	0
Repl01	MoTwoCell	0
Repl01	MoTwoCell	0
Repl01	MoTwoCell	0
Repl01	MoTwoCell	0
Repl01	MoTwoCell	1
Repl01	MoTwoCell	0
Repl01	MoTwoCell	0
Repl01	MoTwoCell	0
Repl01	MoTwoCell	0
Repl01	MoTwoCell	0
Repl01	MoTwoCell	0
Repl01	MoTwoCell	0
Repl01	MoTwoCell	0
Repl01	MoTwoCell	0
Repl01	MoTwoCell	0
Repl01	MoTwoCell	0
Repl01	MoTwoCell	0
Repl01	MoTwoCell	0
Repl01	MoTwoCell	0
Repl01	MoTwoCell	0
Repl01	MoTwoCell	0
Repl01	MoTwoCell	0
Repl01	MoTwoCell	0
Repl01	MoTwoCell	0
Repl01	MoTwoCell	0
Repl01	MoTwoCell	0
Repl01	MoTwoCell	0
Repl01	MoTwoCell	0
Repl01	MoTwoCell	1
Repl01	MoTwoCell	0
Repl01	MoTwoCell	0
Repl01	MoTwoCell	0
Repl01	MoTwoCell	0
Repl01	MoTwoCell	0
Repl01	MoTwoCell	0
Repl01	MoTwoCell	0
Repl01	MoTwoCell	0
Repl01	MoTwoCell	0
Repl01	MoTwoCell	0
Repl01	MoTwoCell	0
Repl01	MoTwoCell	0
Repl01	MoTwoCell	0
Repl01	MoTwoCell	0
Repl01	MoTwoCell	0
Repl01	MoTwoCell	0
Repl01	MoTwoCell	0
Repl01	MoTwoCell	0
Repl01	MoTwoCell	0
Repl01	MoTwoCell	0
Repl01	MoTwoCell	1
Repl01	MoTwoCell	0
Repl01	MoTwoCell	0
Repl01	MoTwoCell	0
Repl01	MoTwoCell	0
Repl01	MoTwoCell	0
Repl01	MoTwoCell	0
Repl01	MoTwoCell	0
Repl01	MoTwoCell	0
Repl01	MoTwoCell	0
Repl01	MoTwoCell	0
Repl01	MoTwoCell	0
Repl01	MoTwoCell	0
Repl01	MoTwoCell	0
Repl01	MoTwoCell	0
Repl01	MoTwoCell	0
Repl01	MoTwoCell	0
Repl01	MoTwoCell	0
Repl01	MoTwoCell	1
Repl01	MoTwoCell	0
Repl01	MoTwoCell	0
Repl01	MoTwoCell	0
Repl01	MoTwoCell	0
Repl01	MoTwoCell	0
Repl01	MoTwoCell	0
Repl01	MoTwoCell	0
Repl01	MoTwoCell	0
Repl01	MoTwoCell	0
Repl01	MoTwoCell	0
Repl01	MoTwoCell	0
Repl01	MoTwoCell	0
Repl01	MoTwoCell	0
Repl01	MoTwoCell	0
Repl01	MoTwoCell	0
Repl01	MoTwoCell	0
Repl01	MoTwoCell	0
Repl01	MoTwoCell	0
Repl01	MoTwoCell	0
Repl01	MoTwoCell	0
Repl01	MoTwoCell	0
Repl01	MoTwoCell	0
Repl01	MoTwoCell	0
Repl01	MoTwoCell	0
Repl01	MoTwoCell	0
Repl01	MoTwoCell	0
Repl01	MoTwoCell	1
Repl01	MoTwoCell	0
Repl01	MoTwoCell	0
Repl01	MoTwoCell	0
Repl01	MoTwoCell	0
Repl01	MoTwoCell	0
Repl01	MoTwoCell	0
Repl01	MoTwoCell	0
Repl01	MoTwoCell	0
Repl01	MoTwoCell	0
Repl01	MoTwoCell	0
Repl01	MoTwoCell	0
Repl01	MoTwoCell	0
Repl01	MoTwoCell	0
Repl01	MoTwoCell	0
Repl01	MoTwoCell	0
Repl01	MoTwoCell	0
Repl01	MoTwoCell	0
Repl01	MoTwoCell	0
Repl01	MoTwoCell	0
Repl01	MoTwoCell	0
Repl02	MoTwoCell	0
Repl02	MoTwoCell	0
Repl02	MoTwoCell	0
Repl02	MoTwoCell	0
Repl02	MoTwoCell	0
Repl02	MoTwoCell	0
Repl02	MoTwoCell	1
Repl02	MoTwoCell	0
Repl02	MoTwoCell	0
Repl02	MoTwoCell	0
Repl02	MoTwoCell	0
Repl02	MoTwoCell	0
Repl02	MoTwoCell	0
Repl02	MoTwoCell	0
Repl02	MoTwoCell	0
Repl02	MoTwoCell	0
Repl02	MoTwoCell	0
Repl02	MoTwoCell	0
Repl02	MoTwoCell	0
Repl02	MoTwoCell	0
Repl02	MoTwoCell	0
Repl02	MoTwoCell	0
Repl02	MoTwoCell	0
Repl02	MoTwoCell	0
Repl02	MoTwoCell	1
Repl02	MoTwoCell	0
Repl02	MoTwoCell	0
Repl02	MoTwoCell	0
Repl02	MoTwoCell	0
Repl02	MoTwoCell	0
Repl02	MoTwoCell	0
Repl02	MoTwoCell	0
Repl02	MoTwoCell	0
Repl02	MoTwoCell	0
Repl02	MoTwoCell	0
Repl02	MoTwoCell	0
Repl02	MoTwoCell	0
Repl02	MoTwoCell	0
Repl02	MoTwoCell	0
Repl02	MoTwoCell	0
Repl02	MoTwoCell	0
Repl02	MoTwoCell	0
Repl02	MoTwoCell	0
Repl02	MoTwoCell	0
Repl02	MoTwoCell	0
Repl02	MoTwoCell	0
Repl02	MoTwoCell	0
Repl02	MoTwoCell	0
Repl02	MoTwoCell	0
Repl02	MoTwoCell	0
Repl02	MoTwoCell	0
Repl02	MoTwoCell	0
Repl02	MoTwoCell	0
Repl02	MoTwoCell	0
Repl02	MoTwoCell	1
Repl02	MoTwoCell	0
Repl02	MoTwoCell	0
Repl02	MoTwoCell	0
Repl02	MoTwoCell	0
Repl02	MoTwoCell	0
Repl02	MoTwoCell	0
Repl02	MoTwoCell	0
Repl02	MoTwoCell	0
Repl02	MoTwoCell	0
Repl02	MoTwoCell	0
Repl02	MoTwoCell	0
Repl02	MoTwoCell	0
Repl02	MoTwoCell	0
Repl02	MoTwoCell	0
Repl02	MoTwoCell	0
Repl02	MoTwoCell	0
Repl02	MoTwoCell	0
Repl02	MoTwoCell	0
Repl02	MoTwoCell	0
Repl02	MoTwoCell	0
Repl02	MoTwoCell	0
Repl02	MoTwoCell	0
Repl02	MoTwoCell	0
Repl02	MoTwoCell	0
Repl02	MoTwoCell	0
Repl02	MoTwoCell	0
Repl02	MoTwoCell	0
Repl02	MoTwoCell	0
Repl02	MoTwoCell	0
Repl02	MoTwoCell	2
Repl02	MoTwoCell	0
Repl02	MoTwoCell	0
Repl02	MoTwoCell	0
Repl02	MoTwoCell	0
Repl02	MoTwoCell	0
Repl02	MoTwoCell	0
Repl02	MoTwoCell	0
Repl02	MoTwoCell	0
Repl02	MoTwoCell	0
Repl02	MoTwoCell	0
Repl02	MoTwoCell	0
Repl02	MoTwoCell	1
Repl02	MoTwoCell	0
Repl02	MoTwoCell	0
Repl02	MoTwoCell	0
Repl02	MoTwoCell	0
Repl02	MoTwoCell	0
Repl02	MoTwoCell	0
Repl02	MoTwoCell	0
Repl02	MoTwoCell	0
Repl02	MoTwoCell	0
Repl02	MoTwoCell	0
Repl02	MoTwoCell	0
Repl02	MoTwoCell	1
Repl02	MoTwoCell	0
Repl02	MoTwoCell	0
Repl02	MoTwoCell	0
Repl02	MoTwoCell	0
Repl02	MoTwoCell	0
Repl02	MoTwoCell	0
Repl02	MoTwoCell	0
Repl02	MoTwoCell	0
Repl02	MoTwoCell	0
Repl02	MoTwoCell	0
Repl02	MoTwoCell	0
Repl02	MoTwoCell	0
Repl02	MoTwoCell	0
Repl02	MoTwoCell	0
Repl02	MoTwoCell	0
Repl02	MoTwoCell	0
Repl02	MoTwoCell	0
Repl02	MoTwoCell	1
Repl02	MoTwoCell	0
Repl02	MoTwoCell	0
Repl02	MoTwoCell	0
Repl02	MoTwoCell	0
Repl02	MoTwoCell	0
Repl02	MoTwoCell	0
Repl02	MoTwoCell	0
Repl02	MoTwoCell	0
Repl02	MoTwoCell	0
Repl02	MoTwoCell	0
Repl02	MoTwoCell	0
Repl02	MoTwoCell	0
Repl02	MoTwoCell	0
Repl02	MoTwoCell	0
Repl02	MoTwoCell	1
Repl02	MoTwoCell	0
Repl02	MoTwoCell	0
Repl02	MoTwoCell	0
Repl02	MoTwoCell	0
Repl02	MoTwoCell	0
Repl02	MoTwoCell	0
Repl02	MoTwoCell	0
Repl02	MoTwoCell	0
Repl02	MoTwoCell	0
Repl02	MoTwoCell	0
Repl02	MoTwoCell	0
Repl02	MoTwoCell	0
Repl02	MoTwoCell	0
Repl02	MoTwoCell	0
Repl02	MoTwoCell	0
Repl02	MoTwoCell	0
Repl02	MoTwoCell	0
Repl02	MoTwoCell	0
Repl02	MoTwoCell	0
Repl03	MoTwoCell	0
Repl03	MoTwoCell	0
Repl03	MoTwoCell	0
Repl03	MoTwoCell	0
Repl03	MoTwoCell	0
Repl03	MoTwoCell	0
Repl03	MoTwoCell	0
Repl03	MoTwoCell	0
Repl03	MoTwoCell	0
Repl03	MoTwoCell	0
Repl03	MoTwoCell	0
Repl03	MoTwoCell	0
Repl03	MoTwoCell	0
Repl03	MoTwoCell	0
Repl03	MoTwoCell	0
Repl03	MoTwoCell	0
Repl03	MoTwoCell	0
Repl03	MoTwoCell	0
Repl03	MoTwoCell	0
Repl03	MoTwoCell	0
Repl03	MoTwoCell	1
Repl03	MoTwoCell	0
Repl03	MoTwoCell	0
Repl03	MoTwoCell	0
Repl03	MoTwoCell	0
Repl03	MoTwoCell	0
Repl03	MoTwoCell	0
Repl03	MoTwoCell	0
Repl03	MoTwoCell	0
Repl03	MoTwoCell	0
Repl03	MoTwoCell	0
Repl03	MoTwoCell	0
Repl03	MoTwoCell	0
Repl03	MoTwoCell	0
Repl03	MoTwoCell	0
Repl03	MoTwoCell	0
Repl03	MoTwoCell	0
Repl03	MoTwoCell	0
Repl03	MoTwoCell	0
Repl03	MoTwoCell	0
Repl03	MoTwoCell	0
Repl03	MoTwoCell	0
Repl03	MoTwoCell	0
Repl03	MoTwoCell	0
Repl03	MoTwoCell	0
Repl03	MoTwoCell	0
Repl03	MoTwoCell	0
Repl03	MoTwoCell	0
Repl03	MoTwoCell	0
Repl03	MoTwoCell	0
Repl03	MoTwoCell	0
Repl03	MoTwoCell	0
Repl03	MoTwoCell	0
Repl03	MoTwoCell	0
Repl03	MoTwoCell	0
Repl03	MoTwoCell	0
Repl03	MoTwoCell	0
Repl03	MoTwoCell	0
Repl03	MoTwoCell	0
Repl03	MoTwoCell	0
Repl03	MoTwoCell	0
Repl03	MoTwoCell	0
Repl03	MoTwoCell	0
Repl03	MoTwoCell	1
Repl03	MoTwoCell	0
Repl03	MoTwoCell	0
Repl03	MoTwoCell	0
Repl03	MoTwoCell	0
Repl03	MoTwoCell	0
Repl03	MoTwoCell	0
Repl03	MoTwoCell	0
Repl03	MoTwoCell	0
Repl03	MoTwoCell	0
Repl03	MoTwoCell	0
Repl03	MoTwoCell	0
Repl03	MoTwoCell	0
Repl03	MoTwoCell	0
Repl03	MoTwoCell	0
Repl03	MoTwoCell	0
Repl03	MoTwoCell	0
Repl03	MoTwoCell	0
Repl03	MoTwoCell	0
Repl03	MoTwoCell	0
Repl03	MoTwoCell	0
Repl03	MoTwoCell	0
Repl03	MoTwoCell	0
Repl03	MoTwoCell	0
Repl03	MoTwoCell	0
Repl03	MoTwoCell	0
Repl03	MoTwoCell	0
Repl03	MoTwoCell	0
Repl03	MoTwoCell	0
Repl03	MoTwoCell	0
Repl03	MoTwoCell	0
Repl03	MoTwoCell	0
Repl03	MoTwoCell	0
Repl03	MoTwoCell	0
Repl03	MoTwoCell	0
Repl03	MoTwoCell	0
Repl03	MoTwoCell	0
Repl03	MoTwoCell	0
Repl03	MoTwoCell	0
Repl03	MoTwoCell	0
Repl03	MoTwoCell	0
Repl03	MoTwoCell	0
Repl03	MoTwoCell	0
Repl03	MoTwoCell	0
Repl03	MoTwoCell	0
Repl03	MoTwoCell	0
Repl03	MoTwoCell	2
Repl03	MoTwoCell	0
Repl03	MoTwoCell	0
Repl03	MoTwoCell	0
Repl03	MoTwoCell	0
Repl03	MoTwoCell	0
Repl03	MoTwoCell	0
Repl03	MoTwoCell	0
Repl03	MoTwoCell	0
Repl03	MoTwoCell	0
Repl03	MoTwoCell	0
Repl03	MoTwoCell	0
Repl03	MoTwoCell	0
Repl03	MoTwoCell	0
Repl03	MoTwoCell	0
Repl03	MoTwoCell	0
Repl03	MoTwoCell	0
Repl03	MoTwoCell	0
Repl03	MoTwoCell	0
Repl03	MoTwoCell	0
Repl03	MoTwoCell	0
Repl03	MoTwoCell	0
Repl03	MoTwoCell	0
Repl03	MoTwoCell	0
Repl03	MoTwoCell	0
Repl03	MoTwoCell	0
Repl03	MoTwoCell	0
Repl03	MoTwoCell	0
Repl03	MoTwoCell	0
Repl03	MoTwoCell	0
Repl03	MoTwoCell	0
Repl03	MoTwoCell	0
Repl03	MoTwoCell	0
Repl03	MoTwoCell	0
Repl03	MoTwoCell	0
Repl03	MoTwoCell	0
Repl03	MoTwoCell	0
Repl03	MoTwoCell	0
Repl03	MoTwoCell	0
Repl03	MoTwoCell	0
Repl03	MoTwoCell	0
Repl03	MoTwoCell	0
Repl03	MoTwoCell	0
Repl03	MoTwoCell	0
Repl03	MoTwoCell	0
Repl03	MoTwoCell	0
Repl03	MoTwoCell	0
Repl03	MoTwoCell	0
Repl03	MoTwoCell	1
Repl03	MoTwoCell	0
Repl03	MoTwoCell	0
Repl03	MoTwoCell	0
Repl03	MoTwoCell	0
Repl03	MoTwoCell	0
Repl03	MoTwoCell	0
Repl03	MoTwoCell	0
Repl03	MoTwoCell	0
Repl03	MoTwoCell	0
Repl03	MoTwoCell	0
Repl03	MoTwoCell	0
Repl03	MoTwoCell	0
Repl03	MoTwoCell	0
Repl03	MoTwoCell	0
Repl03	MoTwoCell	0
Repl03	MoTwoCell	0
Repl03	MoTwoCell	0
Repl03	MoTwoCell	0
Repl03	MoTwoCell	0
Repl03	MoTwoCell	0
Repl03	MoTwoCell	0
Repl03	MoTwoCell	0
Repl03	MoTwoCell	0
Repl03	MoTwoCell	0
Repl03	MoTwoCell	0
Repl01	ZFVE	0
Repl01	ZFVE	0
Repl01	ZFVE	0
Repl01	ZFVE	0
Repl01	ZFVE	0
Repl01	ZFVE	0
Repl01	ZFVE	0
Repl01	ZFVE	0
Repl01	ZFVE	0
Repl01	ZFVE	0
Repl01	ZFVE	0
Repl01	ZFVE	1
Repl01	ZFVE	0
Repl01	ZFVE	0
Repl01	ZFVE	0
Repl01	ZFVE	0
Repl01	ZFVE	0
Repl01	ZFVE	0
Repl01	ZFVE	0
Repl01	ZFVE	0
Repl01	ZFVE	0
Repl01	ZFVE	0
Repl01	ZFVE	0
Repl01	ZFVE	0
Repl01	ZFVE	0
Repl01	ZFVE	0
Repl01	ZFVE	0
Repl01	ZFVE	0
Repl01	ZFVE	0
Repl01	ZFVE	0
Repl01	ZFVE	0
Repl01	ZFVE	0
Repl01	ZFVE	0
Repl01	ZFVE	0
Repl01	ZFVE	0
Repl01	ZFVE	0
Repl01	ZFVE	0
Repl01	ZFVE	1
Repl01	ZFVE	0
Repl01	ZFVE	0
Repl01	ZFVE	0
Repl01	ZFVE	0
Repl01	ZFVE	0
Repl01	ZFVE	0
Repl01	ZFVE	0
Repl01	ZFVE	0
Repl01	ZFVE	0
Repl01	ZFVE	0
Repl01	ZFVE	0
Repl01	ZFVE	0
Repl01	ZFVE	0
Repl01	ZFVE	0
Repl01	ZFVE	0
Repl01	ZFVE	0
Repl01	ZFVE	0
Repl01	ZFVE	0
Repl01	ZFVE	0
Repl01	ZFVE	0
Repl01	ZFVE	0
Repl01	ZFVE	0
Repl01	ZFVE	0
Repl01	ZFVE	0
Repl01	ZFVE	0
Repl01	ZFVE	0
Repl01	ZFVE	0
Repl01	ZFVE	0
Repl02	ZFVE	0
Repl02	ZFVE	0
Repl02	ZFVE	0
Repl02	ZFVE	0
Repl02	ZFVE	0
Repl02	ZFVE	0
Repl02	ZFVE	0
Repl02	ZFVE	0
Repl02	ZFVE	0
Repl02	ZFVE	0
Repl02	ZFVE	0
Repl02	ZFVE	0
Repl02	ZFVE	0
Repl02	ZFVE	0
Repl02	ZFVE	0
Repl02	ZFVE	1
Repl02	ZFVE	0
Repl02	ZFVE	0
Repl02	ZFVE	0
Repl02	ZFVE	0
Repl02	ZFVE	0
Repl02	ZFVE	0
Repl02	ZFVE	0
Repl02	ZFVE	0
Repl02	ZFVE	0
Repl02	ZFVE	0
Repl02	ZFVE	0
Repl02	ZFVE	0
Repl02	ZFVE	0
Repl02	ZFVE	0
Repl02	ZFVE	0
Repl02	ZFVE	0
Repl02	ZFVE	0
Repl02	ZFVE	0
Repl02	ZFVE	0
Repl02	ZFVE	0
Repl02	ZFVE	0
Repl02	ZFVE	0
Repl02	ZFVE	0
Repl02	ZFVE	0
Repl02	ZFVE	0
Repl02	ZFVE	0
Repl02	ZFVE	0
Repl02	ZFVE	0
Repl02	ZFVE	0
Repl02	ZFVE	0
Repl02	ZFVE	0
Repl02	ZFVE	0
Repl02	ZFVE	0
Repl02	ZFVE	0
Repl02	ZFVE	0
Repl02	ZFVE	0
Repl02	ZFVE	0
Repl02	ZFVE	0
Repl02	ZFVE	0
Repl02	ZFVE	0
Repl02	ZFVE	0
Repl02	ZFVE	0
Repl02	ZFVE	0
Repl02	ZFVE	0
Repl02	ZFVE	0
Repl02	ZFVE	0
Repl02	ZFVE	0
Repl02	ZFVE	0
Repl02	ZFVE	0
Repl02	ZFVE	0
Repl02	ZFVE	0
Repl03	ZFVE	0
Repl03	ZFVE	0
Repl03	ZFVE	0
Repl03	ZFVE	0
Repl03	ZFVE	0
Repl03	ZFVE	0
Repl03	ZFVE	0
Repl03	ZFVE	0
Repl03	ZFVE	0
Repl03	ZFVE	0
Repl03	ZFVE	0
Repl03	ZFVE	0
Repl03	ZFVE	0
Repl03	ZFVE	1
Repl03	ZFVE	0
Repl03	ZFVE	0
Repl03	ZFVE	0
Repl03	ZFVE	0
Repl03	ZFVE	0
Repl03	ZFVE	0
Repl03	ZFVE	0
Repl03	ZFVE	0
Repl03	ZFVE	0
Repl03	ZFVE	0
Repl03	ZFVE	0
Repl03	ZFVE	0
Repl03	ZFVE	0
Repl03	ZFVE	0
Repl03	ZFVE	0
Repl03	ZFVE	0
Repl03	ZFVE	0
Repl03	ZFVE	0
Repl03	ZFVE	0
Repl03	ZFVE	0
Repl03	ZFVE	0
Repl03	ZFVE	0
Repl03	ZFVE	0
Repl03	ZFVE	0
Repl03	ZFVE	0
Repl03	ZFVE	0
Repl03	ZFVE	1
Repl03	ZFVE	0
Repl03	ZFVE	0
Repl03	ZFVE	0
Repl03	ZFVE	0
Repl03	ZFVE	0
Repl03	ZFVE	0
Repl03	ZFVE	0
Repl03	ZFVE	0
Repl03	ZFVE	0
Repl03	ZFVE	0
Repl03	ZFVE	0
Repl03	ZFVE	0
Repl03	ZFVE	0
Repl03	ZFVE	0
Repl03	ZFVE	0
Repl03	ZFVE	0
Repl03	ZFVE	0
Repl03	ZFVE	0
Repl03	ZFVE	0
Repl03	ZFVE	0
Repl03	ZFVE	0
Repl03	ZFVE	0
Repl03	ZFVE	0
Repl03	ZFVE	0
Repl03	ZFVE	0
Repl03	ZFVE	0
Repl01	ZFEgg	0
Repl01	ZFEgg	0
Repl01	ZFEgg	0
Repl01	ZFEgg	0
Repl01	ZFEgg	0
Repl01	ZFEgg	0
Repl01	ZFEgg	0
Repl01	ZFEgg	0
Repl01	ZFEgg	0
Repl01	ZFEgg	0
Repl01	ZFEgg	0
Repl01	ZFEgg	1
Repl01	ZFEgg	0
Repl01	ZFEgg	0
Repl01	ZFEgg	0
Repl01	ZFEgg	0
Repl01	ZFEgg	0
Repl01	ZFEgg	0
Repl01	ZFEgg	0
Repl01	ZFEgg	0
Repl01	ZFEgg	0
Repl01	ZFEgg	0
Repl01	ZFEgg	0
Repl01	ZFEgg	0
Repl01	ZFEgg	0
Repl01	ZFEgg	0
Repl01	ZFEgg	0
Repl01	ZFEgg	0
Repl01	ZFEgg	0
Repl01	ZFEgg	0
Repl01	ZFEgg	0
Repl01	ZFEgg	0
Repl01	ZFEgg	0
Repl01	ZFEgg	0
Repl01	ZFEgg	0
Repl01	ZFEgg	0
Repl01	ZFEgg	0
Repl01	ZFEgg	1
Repl01	ZFEgg	0
Repl01	ZFEgg	0
Repl01	ZFEgg	0
Repl01	ZFEgg	0
Repl01	ZFEgg	0
Repl01	ZFEgg	0
Repl01	ZFEgg	0
Repl01	ZFEgg	0
Repl01	ZFEgg	0
Repl01	ZFEgg	0
Repl01	ZFEgg	0
Repl01	ZFEgg	0
Repl01	ZFEgg	0
Repl01	ZFEgg	0
Repl01	ZFEgg	0
Repl01	ZFEgg	0
Repl01	ZFEgg	0
Repl01	ZFEgg	0
Repl01	ZFEgg	0
Repl01	ZFEgg	0
Repl01	ZFEgg	0
Repl01	ZFEgg	0
Repl01	ZFEgg	0
Repl01	ZFEgg	0
Repl01	ZFEgg	0
Repl01	ZFEgg	1
Repl01	ZFEgg	0
Repl01	ZFEgg	0
Repl02	ZFEgg	0
Repl02	ZFEgg	0
Repl02	ZFEgg	0
Repl02	ZFEgg	0
Repl02	ZFEgg	0
Repl02	ZFEgg	0
Repl02	ZFEgg	0
Repl02	ZFEgg	0
Repl02	ZFEgg	0
Repl02	ZFEgg	0
Repl02	ZFEgg	0
Repl02	ZFEgg	0
Repl02	ZFEgg	0
Repl02	ZFEgg	0
Repl02	ZFEgg	0
Repl02	ZFEgg	1
Repl02	ZFEgg	0
Repl02	ZFEgg	0
Repl02	ZFEgg	0
Repl02	ZFEgg	0
Repl02	ZFEgg	0
Repl02	ZFEgg	0
Repl02	ZFEgg	0
Repl02	ZFEgg	0
Repl02	ZFEgg	0
Repl02	ZFEgg	0
Repl02	ZFEgg	0
Repl02	ZFEgg	0
Repl02	ZFEgg	0
Repl02	ZFEgg	0
Repl02	ZFEgg	0
Repl02	ZFEgg	0
Repl02	ZFEgg	0
Repl02	ZFEgg	0
Repl02	ZFEgg	0
Repl02	ZFEgg	0
Repl02	ZFEgg	1
Repl02	ZFEgg	0
Repl02	ZFEgg	0
Repl02	ZFEgg	0
Repl02	ZFEgg	0
Repl02	ZFEgg	0
Repl02	ZFEgg	0
Repl02	ZFEgg	0
Repl02	ZFEgg	0
Repl02	ZFEgg	0
Repl02	ZFEgg	0
Repl02	ZFEgg	0
Repl02	ZFEgg	0
Repl02	ZFEgg	0
Repl02	ZFEgg	0
Repl02	ZFEgg	0
Repl02	ZFEgg	0
Repl02	ZFEgg	0
Repl02	ZFEgg	0
Repl02	ZFEgg	0
Repl02	ZFEgg	0
Repl02	ZFEgg	0
Repl02	ZFEgg	3
Repl02	ZFEgg	0
Repl02	ZFEgg	0
Repl02	ZFEgg	0
Repl02	ZFEgg	0
Repl02	ZFEgg	0
Repl02	ZFEgg	0
Repl02	ZFEgg	0
Repl02	ZFEgg	0
Repl03	ZFEgg	0
Repl03	ZFEgg	0
Repl03	ZFEgg	0
Repl03	ZFEgg	0
Repl03	ZFEgg	0
Repl03	ZFEgg	0
Repl03	ZFEgg	0
Repl03	ZFEgg	0
Repl03	ZFEgg	0
Repl03	ZFEgg	0
Repl03	ZFEgg	0
Repl03	ZFEgg	0
Repl03	ZFEgg	0
Repl03	ZFEgg	2
Repl03	ZFEgg	0
Repl03	ZFEgg	0
Repl03	ZFEgg	0
Repl03	ZFEgg	0
Repl03	ZFEgg	0
Repl03	ZFEgg	0
Repl03	ZFEgg	0
Repl03	ZFEgg	0
Repl03	ZFEgg	0
Repl03	ZFEgg	0
Repl03	ZFEgg	0
Repl03	ZFEgg	0
Repl03	ZFEgg	0
Repl03	ZFEgg	0
Repl03	ZFEgg	0
Repl03	ZFEgg	0
Repl03	ZFEgg	0
Repl03	ZFEgg	0
Repl03	ZFEgg	0
Repl03	ZFEgg	0
Repl03	ZFEgg	0
Repl03	ZFEgg	0
Repl03	ZFEgg	0
Repl03	ZFEgg	0
Repl03	ZFEgg	0
Repl03	ZFEgg	0
Repl03	ZFEgg	1
Repl03	ZFEgg	0
Repl03	ZFEgg	0
Repl03	ZFEgg	0
Repl03	ZFEgg	0
Repl03	ZFEgg	0
Repl03	ZFEgg	0
Repl03	ZFEgg	0
Repl03	ZFEgg	0
Repl03	ZFEgg	0
Repl03	ZFEgg	0
Repl03	ZFEgg	0
Repl03	ZFEgg	0
Repl03	ZFEgg	0
Repl03	ZFEgg	0
Repl03	ZFEgg	0
Repl03	ZFEgg	0
Repl03	ZFEgg	1
Repl03	ZFEgg	0
Repl03	ZFEgg	0
Repl03	ZFEgg	0
Repl03	ZFEgg	0
Repl03	ZFEgg	0
Repl03	ZFEgg	0
Repl03	ZFEgg	0
Repl03	ZFEgg	0
Repl03	ZFEgg	0

## Sheet: Fig_2D
Group	Position	Mean RID	sem				Legend
Control	1	66545.5	4363.64				Position of fluorescence measurement on chorion to the left or right of the micropyle	Microns from micropyle
Control	2	69818.2	2727.27				1	160
Control	3	77454.5	4090.91				2	140
Control	4	81818.2	2727.27				3	120
Control	5	81818.2	3818.18				4	100
Control	6	96000	2454.55				5	80
Control	7	105818	3818.18				6	Micropyle-left-edge
Control	8	89454.5	3545.45				7	Micropyle-center
Control	9	84000	2181.82				8	Micropyle-right-edge
Control	10	76363.6	3545.45				9	80
Control	11	74727.3	2727.27				10	100
Control	12	73090.9	3272.73				11	120
Control	13	67636.4	3818.18				12	140
Trypsin	1	4363.64	3272.73				13	160
Trypsin	2	4909.09	3000
Trypsin	3	5454.55	2181.82
Trypsin	4	7636.36	2727.27
Trypsin	5	8181.82	3000
Trypsin	6	12000	2181.82
Trypsin	7	15818.2	2454.55
Trypsin	8	12000	2181.82
Trypsin	9	7636.36	2727.27
Trypsin	10	6545.45	2454.55
Trypsin	11	4363.64	3272.73
Trypsin	12	3272.73	2727.27
Trypsin	13	2181.82	2727.27

## Sheet: Fig_2F
Replicate	Eggs	Sperm number per 20 um2
Repl01	Control	1
Repl01	Control	4
Repl01	Control	4
Repl01	Control	5
Repl01	Control	4
Repl02	Control	3
Repl02	Control	4
Repl02	Control	4
Repl02	Control	5
Repl02	Control	5
Repl03	Control	4
Repl03	Control	4
Repl03	Control	5
Repl03	Control	4
Repl03	Control	5
Repl01	Trypsin	0
Repl01	Trypsin	0
Repl01	Trypsin	1
Repl01	Trypsin	0
Repl01	Trypsin	0
Repl02	Trypsin	0
Repl02	Trypsin	0.1
Repl02	Trypsin	0
Repl02	Trypsin	1
Repl02	Trypsin	0
Repl03	Trypsin	0
Repl03	Trypsin	0
Repl03	Trypsin	0
Repl03	Trypsin	1
Repl03	Trypsin	1

## Sheet: Fig_2G
Replicate	Control (% Fertilization rate)	Trypsis (% Fertilization rate)
Repl01	90	40
Repl02	82	51
Repl03	73	31

## Sheet: Fig_3B
Replicate	Sample	Sperm/20um area
Repl01	MoEgg	0
Repl01	MoEgg	0
Repl01	MoEgg	1
Repl01	MoEgg	1
Repl01	MoEgg	0
Repl01	MoEgg	0
Repl01	MoEgg	1
Repl01	MoEgg	1
Repl01	MoEgg	0
Repl01	MoEgg	0
Repl01	MoEgg	0
Repl01	MoEgg	3
Repl01	MoEgg	5
Repl01	MoEgg	1
Repl01	MoEgg	0
Repl01	MoEgg	0
Repl01	MoEgg	0
Repl01	MoEgg	0
Repl01	MoEgg	1
Repl01	MoEgg	0
Repl01	MoEgg	0
Repl01	MoEgg	0
Repl01	MoEgg	0
Repl01	MoEgg	0
Repl01	MoEgg	0
Repl01	MoEgg	4
Repl01	MoEgg	1
Repl01	MoEgg	0
Repl01	MoEgg	0
Repl01	MoEgg	1
Repl01	MoEgg	1
Repl01	MoEgg	0
Repl01	MoEgg	0
Repl01	MoEgg	3
Repl01	MoEgg	0
Repl01	MoEgg	0
Repl01	MoEgg	0
Repl01	MoEgg	8
Repl01	MoEgg	1
Repl01	MoEgg	0
Repl01	MoEgg	2
Repl01	MoEgg	3
Repl01	MoEgg	5
Repl01	MoEgg	1
Repl01	MoEgg	0
Repl01	MoEgg	4
Repl01	MoEgg	2
Repl01	MoEgg	5
Repl01	MoEgg	2
Repl01	MoEgg	1
Repl01	MoEgg	0
Repl01	MoEgg	0
Repl01	MoEgg	1
Repl01	MoEgg	9
Repl01	MoEgg	3
Repl01	MoEgg	0
Repl01	MoEgg	0
Repl01	MoEgg	2
Repl01	MoEgg	2
Repl01	MoEgg	3
Repl01	MoEgg	4
Repl01	MoEgg	0
Repl01	MoEgg	2
Repl01	MoEgg	0
Repl01	MoEgg	2
Repl01	MoEgg	0
Repl01	MoEgg	1
Repl01	MoEgg	2
Repl01	MoEgg	2
Repl01	MoEgg	3
Repl01	MoEgg	1
Repl01	MoEgg	0
Repl01	MoEgg	0
Repl01	MoEgg	0
Repl01	MoEgg	0
Repl01	MoEgg	1
Repl01	MoEgg	0
Repl01	MoEgg	0
Repl01	MoEgg	0
Repl01	MoEgg	0
Repl01	MoEgg	0
Repl01	MoEgg	0
Repl01	MoEgg	0
Repl01	MoEgg	1
Repl01	MoEgg	1
Repl01	MoEgg	0
Repl01	MoEgg	0
Repl01	MoEgg	0
Repl01	MoEgg	0
Repl01	MoEgg	0
Repl01	MoEgg	0
Repl01	MoEgg	0
Repl01	MoEgg	0
Repl01	MoEgg	0
Repl01	MoEgg	0
Repl01	MoEgg	1
Repl01	MoEgg	0
Repl01	MoEgg	0
Repl01	MoEgg	0
Repl01	MoEgg	0
Repl01	MoEgg	0
Repl01	MoEgg	1
Repl01	MoEgg	0
Repl01	MoEgg	1
Repl01	MoEgg	2
Repl01	MoEgg	0
Repl01	MoEgg	1
Repl01	MoEgg	0
Repl01	MoEgg	0
Repl01	MoEgg	2
Repl01	MoEgg	1
Repl01	MoEgg	0
Repl01	MoEgg	3
Repl01	MoEgg	1
Repl01	MoEgg	0
Repl01	MoEgg	0
Repl01	MoEgg	0
Repl01	MoEgg	0
Repl01	MoEgg	0
Repl01	MoEgg	1
Repl01	MoEgg	1
Repl01	MoEgg	0
Repl01	MoEgg	0
Repl01	MoEgg	0
Repl01	MoEgg	0
Repl01	MoEgg	0
Repl01	MoEgg	2
Repl01	MoEgg	0
Repl01	MoEgg	0
Repl01	MoEgg	0
Repl01	MoEgg	0
Repl01	MoEgg	0
Repl01	MoEgg	1
Repl01	MoEgg	0
Repl01	MoEgg	0
Repl01	MoEgg	0
Repl01	MoEgg	0
Repl01	MoEgg	0
Repl01	MoEgg	2
Repl01	MoEgg	0
Repl01	MoEgg	1
Repl01	MoEgg	0
Repl01	MoEgg	2
Repl01	MoEgg	0
Repl01	MoEgg	0
Repl01	MoEgg	5
Repl01	MoEgg	2
Repl01	MoEgg	1
Repl01	MoEgg	0
Repl01	MoEgg	0
Repl01	MoEgg	1
Repl01	MoEgg	0
Repl01	MoEgg	0
Repl01	MoEgg	0
Repl01	MoEgg	0
Repl01	MoEgg	0
Repl01	MoEgg	2
Repl01	MoEgg	0
Repl01	MoEgg	1
Repl01	MoEgg	1
Repl01	MoEgg	0
Repl01	MoEgg	3
Repl01	MoEgg	1
Repl01	MoEgg	0
Repl01	MoEgg	0
Repl01	MoEgg	0
Repl01	MoEgg	0
Repl01	MoEgg	2
Repl01	MoEgg	0
Repl01	MoEgg	0
Repl01	MoEgg	0
Repl01	MoEgg	0
Repl01	MoEgg	0
Repl01	MoEgg	0
Repl01	MoEgg	0
Repl01	MoEgg	2
Repl01	MoEgg	2
Repl01	MoEgg	2
Repl01	MoEgg	3
Repl01	MoEgg	5
Repl01	MoEgg	0
Repl01	MoEgg	3
Repl01	MoEgg	4
Repl01	MoEgg	5
Repl01	MoEgg	0
Repl01	MoEgg	0
Repl01	MoEgg	4
Repl01	MoEgg	0
Repl01	MoEgg	0
Repl02	MoEgg	0
Repl02	MoEgg	0
Repl02	MoEgg	0
Repl02	MoEgg	5
Repl02	MoEgg	0
Repl02	MoEgg	0
Repl02	MoEgg	0
Repl02	MoEgg	1
Repl02	MoEgg	1
Repl02	MoEgg	2
Repl02	MoEgg	1
Repl02	MoEgg	1
Repl02	MoEgg	0
Repl02	MoEgg	0
Repl02	MoEgg	3
Repl02	MoEgg	0
Repl02	MoEgg	2
Repl02	MoEgg	0
Repl02	MoEgg	0
Repl02	MoEgg	0
Repl02	MoEgg	2
Repl02	MoEgg	0
Repl02	MoEgg	2
Repl02	MoEgg	0
Repl02	MoEgg	2
Repl02	MoEgg	1
Repl02	MoEgg	0
Repl02	MoEgg	3
Repl02	MoEgg	1
Repl02	MoEgg	3
Repl02	MoEgg	4
Repl02	MoEgg	5
Repl02	MoEgg	1
Repl02	MoEgg	2
Repl02	MoEgg	2
Repl02	MoEgg	1
Repl02	MoEgg	0
Repl02	MoEgg	2
Repl02	MoEgg	4
Repl02	MoEgg	4
Repl02	MoEgg	0
Repl02	MoEgg	0
Repl02	MoEgg	0
Repl02	MoEgg	0
Repl02	MoEgg	2
Repl02	MoEgg	1
Repl02	MoEgg	0
Repl02	MoEgg	0
Repl02	MoEgg	0
Repl02	MoEgg	0
Repl02	MoEgg	2
Repl02	MoEgg	1
Repl02	MoEgg	1
Repl02	MoEgg	2
Repl02	MoEgg	1
Repl02	MoEgg	1
Repl02	MoEgg	4
Repl02	MoEgg	0
Repl02	MoEgg	1
Repl02	MoEgg	1
Repl02	MoEgg	4
Repl02	MoEgg	2
Repl02	MoEgg	0
Repl02	MoEgg	0
Repl02	MoEgg	1
Repl02	MoEgg	1
Repl02	MoEgg	3
Repl02	MoEgg	3
Repl02	MoEgg	0
Repl02	MoEgg	0
Repl02	MoEgg	0
Repl02	MoEgg	1
Repl02	MoEgg	0
Repl02	MoEgg	0
Repl02	MoEgg	0
Repl02	MoEgg	0
Repl02	MoEgg	0
Repl02	MoEgg	0
Repl02	MoEgg	0
Repl02	MoEgg	0
Repl02	MoEgg	0
Repl02	MoEgg	0
Repl02	MoEgg	0
Repl02	MoEgg	0
Repl02	MoEgg	0
Repl02	MoEgg	0
Repl02	MoEgg	2
Repl02	MoEgg	1
Repl02	MoEgg	0
Repl02	MoEgg	0
Repl02	MoEgg	0
Repl02	MoEgg	0
Repl02	MoEgg	3
Repl02	MoEgg	0
Repl02	MoEgg	0
Repl02	MoEgg	0
Repl02	MoEgg	0
Repl02	MoEgg	2
Repl02	MoEgg	2
Repl02	MoEgg	2
Repl02	MoEgg	1
Repl02	MoEgg	6
Repl02	MoEgg	1
Repl02	MoEgg	3
Repl02	MoEgg	2
Repl02	MoEgg	1
Repl02	MoEgg	1
Repl02	MoEgg	1
Repl02	MoEgg	0
Repl02	MoEgg	0
Repl02	MoEgg	0
Repl02	MoEgg	1
Repl02	MoEgg	0
Repl02	MoEgg	1
Repl02	MoEgg	0
Repl02	MoEgg	0
Repl02	MoEgg	4
Repl02	MoEgg	3
Repl02	MoEgg	1
Repl02	MoEgg	0
Repl02	MoEgg	3
Repl02	MoEgg	0
Repl02	MoEgg	4
Repl02	MoEgg	1
Repl02	MoEgg	0
Repl02	MoEgg	0
Repl02	MoEgg	0
Repl02	MoEgg	1
Repl02	MoEgg	2
Repl02	MoEgg	0
Repl02	MoEgg	2
Repl02	MoEgg	9
Repl02	MoEgg	1
Repl02	MoEgg	4
Repl02	MoEgg	1
Repl02	MoEgg	0
Repl02	MoEgg	1
Repl02	MoEgg	2
Repl02	MoEgg	0
Repl02	MoEgg	3
Repl02	MoEgg	1
Repl02	MoEgg	1
Repl02	MoEgg	0
Repl02	MoEgg	0
Repl02	MoEgg	0
Repl02	MoEgg	0
Repl02	MoEgg	0
Repl02	MoEgg	2
Repl02	MoEgg	0
Repl02	MoEgg	0
Repl02	MoEgg	0
Repl02	MoEgg	0
Repl02	MoEgg	1
Repl02	MoEgg	2
Repl02	MoEgg	0
Repl02	MoEgg	0
Repl02	MoEgg	0
Repl02	MoEgg	0
Repl02	MoEgg	3
Repl02	MoEgg	1
Repl02	MoEgg	0
Repl02	MoEgg	0
Repl02	MoEgg	0
Repl02	MoEgg	1
Repl02	MoEgg	1
Repl02	MoEgg	0
Repl02	MoEgg	1
Repl02	MoEgg	1
Repl02	MoEgg	1
Repl02	MoEgg	1
Repl02	MoEgg	0
Repl02	MoEgg	2
Repl02	MoEgg	3
Repl02	MoEgg	5
Repl02	MoEgg	2
Repl02	MoEgg	3
Repl02	MoEgg	1
Repl02	MoEgg	4
Repl02	MoEgg	0
Repl02	MoEgg	1
Repl02	MoEgg	0
Repl02	MoEgg	0
Repl02	MoEgg	3
Repl02	MoEgg	2
Repl02	MoEgg	0
Repl02	MoEgg	1
Repl02	MoEgg	1
Repl02	MoEgg	1
Repl02	MoEgg	4
Repl02	MoEgg	0
Repl02	MoEgg	0
Repl03	MoEgg	1
Repl03	MoEgg	1
Repl03	MoEgg	0
Repl03	MoEgg	8
Repl03	MoEgg	1
Repl03	MoEgg	0
Repl03	MoEgg	0
Repl03	MoEgg	1
Repl03	MoEgg	1
Repl03	MoEgg	2
Repl03	MoEgg	1
Repl03	MoEgg	4
Repl03	MoEgg	1
Repl03	MoEgg	4
Repl03	MoEgg	5
Repl03	MoEgg	3
Repl03	MoEgg	0
Repl03	MoEgg	0
Repl03	MoEgg	2
Repl03	MoEgg	1
Repl03	MoEgg	0
Repl03	MoEgg	0
Repl03	MoEgg	0
Repl03	MoEgg	0
Repl03	MoEgg	0
Repl03	MoEgg	0
Repl03	MoEgg	0
Repl03	MoEgg	3
Repl03	MoEgg	0
Repl03	MoEgg	1
Repl03	MoEgg	0
Repl03	MoEgg	0
Repl03	MoEgg	0
Repl03	MoEgg	1
Repl03	MoEgg	2
Repl03	MoEgg	0
Repl03	MoEgg	0
Repl03	MoEgg	0
Repl03	MoEgg	0
Repl03	MoEgg	1
Repl03	MoEgg	1
Repl03	MoEgg	4
Repl03	MoEgg	0
Repl03	MoEgg	0
Repl03	MoEgg	0
Repl03	MoEgg	1
Repl03	MoEgg	0
Repl03	MoEgg	0
Repl03	MoEgg	2
Repl03	MoEgg	0
Repl03	MoEgg	3
Repl03	MoEgg	0
Repl03	MoEgg	0
Repl03	MoEgg	1
Repl03	MoEgg	0
Repl03	MoEgg	3
Repl03	MoEgg	1
Repl03	MoEgg	0
Repl03	MoEgg	0
Repl03	MoEgg	0
Repl03	MoEgg	0
Repl03	MoEgg	0
Repl03	MoEgg	0
Repl03	MoEgg	0
Repl03	MoEgg	0
Repl03	MoEgg	0
Repl03	MoEgg	0
Repl03	MoEgg	0
Repl03	MoEgg	0
Repl03	MoEgg	4
Repl03	MoEgg	3
Repl03	MoEgg	0
Repl03	MoEgg	0
Repl03	MoEgg	0
Repl03	MoEgg	0
Repl03	MoEgg	4
Repl03	MoEgg	0
Repl03	MoEgg	0
Repl03	MoEgg	0
Repl03	MoEgg	0
Repl03	MoEgg	1
Repl03	MoEgg	0
Repl03	MoEgg	0
Repl03	MoEgg	7
Repl03	MoEgg	0
Repl03	MoEgg	2
Repl03	MoEgg	0
Repl03	MoEgg	0
Repl03	MoEgg	0
Repl03	MoEgg	3
Repl03	MoEgg	3
Repl03	MoEgg	5
Repl03	MoEgg	4
Repl03	MoEgg	2
Repl03	MoEgg	5
Repl03	MoEgg	3
Repl03	MoEgg	2
Repl03	MoEgg	3
Repl03	MoEgg	1
Repl03	MoEgg	1
Repl03	MoEgg	2
Repl03	MoEgg	1
Repl03	MoEgg	1
Repl03	MoEgg	0
Repl03	MoEgg	1
Repl03	MoEgg	7
Repl03	MoEgg	2
Repl03	MoEgg	0
Repl03	MoEgg	0
Repl03	MoEgg	0
Repl03	MoEgg	0
Repl03	MoEgg	4
Repl03	MoEgg	1
Repl03	MoEgg	1
Repl03	MoEgg	0
Repl03	MoEgg	1
Repl03	MoEgg	1
Repl03	MoEgg	6
Repl03	MoEgg	0
Repl03	MoEgg	7
Repl03	MoEgg	1
Repl03	MoEgg	3
Repl03	MoEgg	2
Repl03	MoEgg	0
Repl03	MoEgg	0
Repl03	MoEgg	2
Repl03	MoEgg	3
Repl03	MoEgg	1
Repl03	MoEgg	2
Repl03	MoEgg	2
Repl03	MoEgg	2
Repl03	MoEgg	0
Repl03	MoEgg	0
Repl03	MoEgg	3
Repl03	MoEgg	0
Repl03	MoEgg	2
Repl03	MoEgg	2
Repl03	MoEgg	1
Repl03	MoEgg	0
Repl03	MoEgg	0
Repl03	MoEgg	1
Repl03	MoEgg	1
Repl03	MoEgg	2
Repl03	MoEgg	0
Repl03	MoEgg	0
Repl03	MoEgg	1
Repl03	MoEgg	0
Repl03	MoEgg	7
Repl03	MoEgg	0
Repl03	MoEgg	0
Repl03	MoEgg	0
Repl03	MoEgg	1
Repl03	MoEgg	0
Repl03	MoEgg	1
Repl03	MoEgg	1
Repl03	MoEgg	4
Repl03	MoEgg	4
Repl03	MoEgg	3
Repl03	MoEgg	3
Repl03	MoEgg	9
Repl03	MoEgg	0
Repl03	MoEgg	1
Repl03	MoEgg	1
Repl03	MoEgg	1
Repl03	MoEgg	3
Repl03	MoEgg	2
Repl03	MoEgg	1
Repl03	MoEgg	0
Repl03	MoEgg	0
Repl03	MoEgg	0
Repl03	MoEgg	0
Repl03	MoEgg	1
Repl03	MoEgg	1
Repl03	MoEgg	0
Repl03	MoEgg	0
Repl03	MoEgg	0
Repl03	MoEgg	0
Repl03	MoEgg	2
Repl03	MoEgg	1
Repl03	MoEgg	0
Repl03	MoEgg	0
Repl03	MoEgg	0
Repl03	MoEgg	0
Repl03	MoEgg	2
Repl03	MoEgg	1
Repl03	MoEgg	0
Repl03	MoEgg	0
Repl03	MoEgg	0
Repl03	MoEgg	1
Repl03	MoEgg	0
Repl03	MoEgg	0
Repl03	MoEgg	2
Repl03	MoEgg	1
Repl03	MoEgg	1
Repl03	MoEgg	0
Repl03	MoEgg	1
Repl01	ZFMicpl	3
Repl01	ZFMicpl	3
Repl01	ZFMicpl	4
Repl01	ZFMicpl	3
Repl01	ZFMicpl	3
Repl01	ZFMicpl	4
Repl01	ZFMicpl	2
Repl01	ZFMicpl	0
Repl01	ZFMicpl	1
Repl01	ZFMicpl	3
Repl01	ZFMicpl	3
Repl01	ZFMicpl	4
Repl01	ZFMicpl	5
Repl01	ZFMicpl	4
Repl01	ZFMicpl	3
Repl01	ZFMicpl	3
Repl01	ZFMicpl	3
Repl01	ZFMicpl	2
Repl01	ZFMicpl	2
Repl01	ZFMicpl	1
Repl01	ZFMicpl	3
Repl01	ZFMicpl	1
Repl01	ZFMicpl	2
Repl01	ZFMicpl	2
Repl01	ZFMicpl	2
Repl01	ZFMicpl	1
Repl01	ZFMicpl	0
Repl01	ZFMicpl	3
Repl01	ZFMicpl	1
Repl01	ZFMicpl	1
Repl01	ZFMicpl	0
Repl01	ZFMicpl	3
Repl01	ZFMicpl	1
Repl01	ZFMicpl	1
Repl01	ZFMicpl	2
Repl01	ZFMicpl	3
Repl01	ZFMicpl	0
Repl01	ZFMicpl	2
Repl01	ZFMicpl	0
Repl01	ZFMicpl	1
Repl01	ZFMicpl	0
Repl02	ZFMicpl	0
Repl02	ZFMicpl	0
Repl02	ZFMicpl	0
Repl02	ZFMicpl	0
Repl02	ZFMicpl	0
Repl02	ZFMicpl	0
Repl02	ZFMicpl	0
Repl02	ZFMicpl	0
Repl02	ZFMicpl	1
Repl02	ZFMicpl	0
Repl02	ZFMicpl	0
Repl02	ZFMicpl	0
Repl02	ZFMicpl	0
Repl02	ZFMicpl	0
Repl02	ZFMicpl	0
Repl02	ZFMicpl	0
Repl02	ZFMicpl	0
Repl02	ZFMicpl	1
Repl02	ZFMicpl	1
Repl02	ZFMicpl	1
Repl02	ZFMicpl	1
Repl02	ZFMicpl	1
Repl02	ZFMicpl	1
Repl02	ZFMicpl	1
Repl02	ZFMicpl	0
Repl02	ZFMicpl	1
Repl02	ZFMicpl	1
Repl02	ZFMicpl	1
Repl02	ZFMicpl	1
Repl02	ZFMicpl	1
Repl02	ZFMicpl	1
Repl02	ZFMicpl	1
Repl02	ZFMicpl	1
Repl02	ZFMicpl	1
Repl02	ZFMicpl	1
Repl02	ZFMicpl	4
Repl02	ZFMicpl	0
Repl02	ZFMicpl	0
Repl02	ZFMicpl	1
Repl02	ZFMicpl	1
Repl02	ZFMicpl	1
Repl03	ZFMicpl	0
Repl03	ZFMicpl	0
Repl03	ZFMicpl	0
Repl03	ZFMicpl	0
Repl03	ZFMicpl	0
Repl03	ZFMicpl	0
Repl03	ZFMicpl	0
Repl03	ZFMicpl	0
Repl03	ZFMicpl	0
Repl03	ZFMicpl	0
Repl03	ZFMicpl	0
Repl03	ZFMicpl	0
Repl03	ZFMicpl	1
Repl03	ZFMicpl	1
Repl03	ZFMicpl	0
Repl03	ZFMicpl	0
Repl03	ZFMicpl	0
Repl03	ZFMicpl	0
Repl03	ZFMicpl	0
Repl03	ZFMicpl	0
Repl03	ZFMicpl	0
Repl03	ZFMicpl	0
Repl03	ZFMicpl	1
Repl03	ZFMicpl	2
Repl03	ZFMicpl	2
Repl03	ZFMicpl	1
Repl03	ZFMicpl	1
Repl03	ZFMicpl	1
Repl03	ZFMicpl	1
Repl03	ZFMicpl	1
Repl03	ZFMicpl	1
Repl03	ZFMicpl	1
Repl03	ZFMicpl	1
Repl03	ZFMicpl	1
Repl03	ZFMicpl	1
Repl03	ZFMicpl	1
Repl03	ZFMicpl	2
Repl03	ZFMicpl	2
Repl03	ZFMicpl	2
Repl01	MoTwoCell	1
Repl01	MoTwoCell	0
Repl01	MoTwoCell	0
Repl01	MoTwoCell	0
Repl01	MoTwoCell	0
Repl01	MoTwoCell	0
Repl01	MoTwoCell	0
Repl01	MoTwoCell	0
Repl01	MoTwoCell	0
Repl01	MoTwoCell	0
Repl01	MoTwoCell	0
Repl01	MoTwoCell	1
Repl01	MoTwoCell	0
Repl01	MoTwoCell	0
Repl01	MoTwoCell	0
Repl01	MoTwoCell	0
Repl01	MoTwoCell	0
Repl01	MoTwoCell	0
Repl01	MoTwoCell	0
Repl01	MoTwoCell	0
Repl01	MoTwoCell	0
Repl01	MoTwoCell	0
Repl01	MoTwoCell	0
Repl01	MoTwoCell	0
Repl01	MoTwoCell	0
Repl01	MoTwoCell	0
Repl01	MoTwoCell	0
Repl01	MoTwoCell	0
Repl01	MoTwoCell	0
Repl01	MoTwoCell	0
Repl01	MoTwoCell	1
Repl01	MoTwoCell	1
Repl01	MoTwoCell	0
Repl01	MoTwoCell	0
Repl01	MoTwoCell	0
Repl01	MoTwoCell	0
Repl01	MoTwoCell	0
Repl01	MoTwoCell	0
Repl01	MoTwoCell	0
Repl01	MoTwoCell	0
Repl01	MoTwoCell	0
Repl01	MoTwoCell	0
Repl01	MoTwoCell	0
Repl01	MoTwoCell	0
Repl01	MoTwoCell	0
Repl01	MoTwoCell	0
Repl01	MoTwoCell	0
Repl01	MoTwoCell	0
Repl01	MoTwoCell	0
Repl01	MoTwoCell	0
Repl01	MoTwoCell	0
Repl01	MoTwoCell	0
Repl01	MoTwoCell	0
Repl01	MoTwoCell	0
Repl01	MoTwoCell	0
Repl01	MoTwoCell	0
Repl01	MoTwoCell	0
Repl01	MoTwoCell	0
Repl01	MoTwoCell	1
Repl01	MoTwoCell	0
Repl01	MoTwoCell	0
Repl01	MoTwoCell	0
Repl01	MoTwoCell	0
Repl01	MoTwoCell	0
Repl01	MoTwoCell	0
Repl01	MoTwoCell	0
Repl01	MoTwoCell	0
Repl01	MoTwoCell	0
Repl01	MoTwoCell	0
Repl01	MoTwoCell	0
Repl01	MoTwoCell	1
Repl01	MoTwoCell	0
Repl01	MoTwoCell	0
Repl01	MoTwoCell	0
Repl01	MoTwoCell	0
Repl01	MoTwoCell	0
Repl01	MoTwoCell	0
Repl01	MoTwoCell	0
Repl01	MoTwoCell	0
Repl01	MoTwoCell	0
Repl01	MoTwoCell	0
Repl01	MoTwoCell	0
Repl01	MoTwoCell	0
Repl01	MoTwoCell	0
Repl01	MoTwoCell	0
Repl01	MoTwoCell	0
Repl01	MoTwoCell	0
Repl01	MoTwoCell	1
Repl01	MoTwoCell	0
Repl01	MoTwoCell	0
Repl01	MoTwoCell	0
Repl01	MoTwoCell	0
Repl01	MoTwoCell	0
Repl01	MoTwoCell	0
Repl01	MoTwoCell	1
Repl01	MoTwoCell	0
Repl01	MoTwoCell	0
Repl01	MoTwoCell	0
Repl01	MoTwoCell	0
Repl01	MoTwoCell	0
Repl01	MoTwoCell	0
Repl01	MoTwoCell	2
Repl01	MoTwoCell	0
Repl01	MoTwoCell	0
Repl01	MoTwoCell	0
Repl01	MoTwoCell	0
Repl01	MoTwoCell	0
Repl01	MoTwoCell	0
Repl01	MoTwoCell	1
Repl01	MoTwoCell	1
Repl01	MoTwoCell	0
Repl01	MoTwoCell	0
Repl01	MoTwoCell	0
Repl01	MoTwoCell	0
Repl01	MoTwoCell	0
Repl01	MoTwoCell	0
Repl01	MoTwoCell	0
Repl01	MoTwoCell	0
Repl01	MoTwoCell	0
Repl01	MoTwoCell	1
Repl01	MoTwoCell	0
Repl01	MoTwoCell	0
Repl01	MoTwoCell	0
Repl01	MoTwoCell	0
Repl01	MoTwoCell	0
Repl01	MoTwoCell	0
Repl01	MoTwoCell	0
Repl01	MoTwoCell	0
Repl01	MoTwoCell	0
Repl01	MoTwoCell	0
Repl01	MoTwoCell	0
Repl01	MoTwoCell	1
Repl01	MoTwoCell	1
Repl01	MoTwoCell	0
Repl01	MoTwoCell	0
Repl01	MoTwoCell	0
Repl01	MoTwoCell	1
Repl01	MoTwoCell	0
Repl01	MoTwoCell	0
Repl01	MoTwoCell	0
Repl01	MoTwoCell	1
Repl01	MoTwoCell	0
Repl01	MoTwoCell	0
Repl01	MoTwoCell	0
Repl01	MoTwoCell	1
Repl01	MoTwoCell	1
Repl01	MoTwoCell	0
Repl01	MoTwoCell	0
Repl01	MoTwoCell	0
Repl01	MoTwoCell	0
Repl01	MoTwoCell	0
Repl01	MoTwoCell	0
Repl01	MoTwoCell	0
Repl01	MoTwoCell	0
Repl01	MoTwoCell	0
Repl01	MoTwoCell	0
Repl01	MoTwoCell	0
Repl01	MoTwoCell	0
Repl01	MoTwoCell	0
Repl01	MoTwoCell	0
Repl01	MoTwoCell	0
Repl01	MoTwoCell	0
Repl01	MoTwoCell	0
Repl01	MoTwoCell	0
Repl01	MoTwoCell	0
Repl01	MoTwoCell	0
Repl01	MoTwoCell	0
Repl01	MoTwoCell	0
Repl01	MoTwoCell	0
Repl01	MoTwoCell	0
Repl01	MoTwoCell	0
Repl01	MoTwoCell	1
Repl01	MoTwoCell	1
Repl01	MoTwoCell	0
Repl01	MoTwoCell	0
Repl01	MoTwoCell	0
Repl01	MoTwoCell	0
Repl01	MoTwoCell	0
Repl01	MoTwoCell	0
Repl01	MoTwoCell	0
Repl01	MoTwoCell	0
Repl02	MoTwoCell	0
Repl02	MoTwoCell	0
Repl02	MoTwoCell	0
Repl02	MoTwoCell	0
Repl02	MoTwoCell	0
Repl02	MoTwoCell	0
Repl02	MoTwoCell	0
Repl02	MoTwoCell	0
Repl02	MoTwoCell	0
Repl02	MoTwoCell	0
Repl02	MoTwoCell	0
Repl02	MoTwoCell	0
Repl02	MoTwoCell	0
Repl02	MoTwoCell	0
Repl02	MoTwoCell	0
Repl02	MoTwoCell	0
Repl02	MoTwoCell	0
Repl02	MoTwoCell	0
Repl02	MoTwoCell	1
Repl02	MoTwoCell	0
Repl02	MoTwoCell	0
Repl02	MoTwoCell	0
Repl02	MoTwoCell	0
Repl02	MoTwoCell	0
Repl02	MoTwoCell	0
Repl02	MoTwoCell	0
Repl02	MoTwoCell	0
Repl02	MoTwoCell	0
Repl02	MoTwoCell	0
Repl02	MoTwoCell	0
Repl02	MoTwoCell	0
Repl02	MoTwoCell	0
Repl02	MoTwoCell	0
Repl02	MoTwoCell	0
Repl02	MoTwoCell	0
Repl02	MoTwoCell	0
Repl02	MoTwoCell	0
Repl02	MoTwoCell	0
Repl02	MoTwoCell	0
Repl02	MoTwoCell	0
Repl02	MoTwoCell	0
Repl02	MoTwoCell	0
Repl02	MoTwoCell	1
Repl02	MoTwoCell	0
Repl02	MoTwoCell	0
Repl02	MoTwoCell	0
Repl02	MoTwoCell	0
Repl02	MoTwoCell	0
Repl02	MoTwoCell	0
Repl02	MoTwoCell	0
Repl02	MoTwoCell	0
Repl02	MoTwoCell	0
Repl02	MoTwoCell	0
Repl02	MoTwoCell	0
Repl02	MoTwoCell	0
Repl02	MoTwoCell	0
Repl02	MoTwoCell	0
Repl02	MoTwoCell	0
Repl02	MoTwoCell	0
Repl02	MoTwoCell	0
Repl02	MoTwoCell	0
Repl02	MoTwoCell	0
Repl02	MoTwoCell	0
Repl02	MoTwoCell	0
Repl02	MoTwoCell	0
Repl02	MoTwoCell	0
Repl02	MoTwoCell	0
Repl02	MoTwoCell	0
Repl02	MoTwoCell	0
Repl02	MoTwoCell	1
Repl02	MoTwoCell	0
Repl02	MoTwoCell	0
Repl02	MoTwoCell	0
Repl02	MoTwoCell	0
Repl02	MoTwoCell	0
Repl02	MoTwoCell	0
Repl02	MoTwoCell	0
Repl02	MoTwoCell	0
Repl02	MoTwoCell	0
Repl02	MoTwoCell	0
Repl02	MoTwoCell	0
Repl02	MoTwoCell	0
Repl02	MoTwoCell	0
Repl02	MoTwoCell	0
Repl02	MoTwoCell	0
Repl02	MoTwoCell	0
Repl02	MoTwoCell	0
Repl02	MoTwoCell	0
Repl02	MoTwoCell	0
Repl02	MoTwoCell	0
Repl02	MoTwoCell	0
Repl02	MoTwoCell	0
Repl02	MoTwoCell	0
Repl02	MoTwoCell	0
Repl02	MoTwoCell	0
Repl02	MoTwoCell	0
Repl02	MoTwoCell	1
Repl02	MoTwoCell	0
Repl02	MoTwoCell	0
Repl02	MoTwoCell	0
Repl02	MoTwoCell	0
Repl02	MoTwoCell	0
Repl02	MoTwoCell	0
Repl02	MoTwoCell	0
Repl02	MoTwoCell	0
Repl02	MoTwoCell	0
Repl02	MoTwoCell	0
Repl02	MoTwoCell	0
Repl02	MoTwoCell	0
Repl02	MoTwoCell	0
Repl02	MoTwoCell	0
Repl02	MoTwoCell	0
Repl02	MoTwoCell	0
Repl02	MoTwoCell	0
Repl02	MoTwoCell	0
Repl02	MoTwoCell	0
Repl02	MoTwoCell	0
Repl02	MoTwoCell	0
Repl02	MoTwoCell	0
Repl02	MoTwoCell	0
Repl02	MoTwoCell	1
Repl02	MoTwoCell	0
Repl02	MoTwoCell	0
Repl02	MoTwoCell	0
Repl02	MoTwoCell	0
Repl02	MoTwoCell	0
Repl02	MoTwoCell	0
Repl02	MoTwoCell	0
Repl02	MoTwoCell	0
Repl02	MoTwoCell	0
Repl02	MoTwoCell	0
Repl02	MoTwoCell	0
Repl02	MoTwoCell	0
Repl02	MoTwoCell	0
Repl02	MoTwoCell	0
Repl02	MoTwoCell	0
Repl02	MoTwoCell	0
Repl02	MoTwoCell	0
Repl02	MoTwoCell	0
Repl02	MoTwoCell	0
Repl02	MoTwoCell	0
Repl02	MoTwoCell	0
Repl02	MoTwoCell	0
Repl02	MoTwoCell	0
Repl02	MoTwoCell	0
Repl02	MoTwoCell	0
Repl02	MoTwoCell	0
Repl02	MoTwoCell	1
Repl02	MoTwoCell	0
Repl02	MoTwoCell	0
Repl02	MoTwoCell	0
Repl02	MoTwoCell	0
Repl02	MoTwoCell	0
Repl02	MoTwoCell	0
Repl02	MoTwoCell	0
Repl02	MoTwoCell	0
Repl02	MoTwoCell	0
Repl02	MoTwoCell	0
Repl02	MoTwoCell	0
Repl02	MoTwoCell	0
Repl02	MoTwoCell	0
Repl02	MoTwoCell	0
Repl02	MoTwoCell	0
Repl02	MoTwoCell	0
Repl02	MoTwoCell	0
Repl02	MoTwoCell	0
Repl02	MoTwoCell	0
Repl02	MoTwoCell	0
Repl02	MoTwoCell	0
Repl02	MoTwoCell	0
Repl02	MoTwoCell	0
Repl02	MoTwoCell	0
Repl02	MoTwoCell	0
Repl02	MoTwoCell	0
Repl02	MoTwoCell	1
Repl02	MoTwoCell	0
Repl02	MoTwoCell	0
Repl02	MoTwoCell	0
Repl02	MoTwoCell	0
Repl02	MoTwoCell	0
Repl03	MoTwoCell	0
Repl03	MoTwoCell	0
Repl03	MoTwoCell	0
Repl03	MoTwoCell	0
Repl03	MoTwoCell	0
Repl03	MoTwoCell	0
Repl03	MoTwoCell	0
Repl03	MoTwoCell	0
Repl03	MoTwoCell	0
Repl03	MoTwoCell	0
Repl03	MoTwoCell	0
Repl03	MoTwoCell	0
Repl03	MoTwoCell	0
Repl03	MoTwoCell	0
Repl03	MoTwoCell	0
Repl03	MoTwoCell	0
Repl03	MoTwoCell	0
Repl03	MoTwoCell	0
Repl03	MoTwoCell	0
Repl03	MoTwoCell	0
Repl03	MoTwoCell	0
Repl03	MoTwoCell	1
Repl03	MoTwoCell	0
Repl03	MoTwoCell	0
Repl03	MoTwoCell	0
Repl03	MoTwoCell	0
Repl03	MoTwoCell	0
Repl03	MoTwoCell	0
Repl03	MoTwoCell	0
Repl03	MoTwoCell	0
Repl03	MoTwoCell	0
Repl03	MoTwoCell	0
Repl03	MoTwoCell	0
Repl03	MoTwoCell	0
Repl03	MoTwoCell	0
Repl03	MoTwoCell	0
Repl03	MoTwoCell	0
Repl03	MoTwoCell	0
Repl03	MoTwoCell	0
Repl03	MoTwoCell	0
Repl03	MoTwoCell	0
Repl03	MoTwoCell	0
Repl03	MoTwoCell	0
Repl03	MoTwoCell	0
Repl03	MoTwoCell	0
Repl03	MoTwoCell	0
Repl03	MoTwoCell	0
Repl03	MoTwoCell	0
Repl03	MoTwoCell	0
Repl03	MoTwoCell	0
Repl03	MoTwoCell	0
Repl03	MoTwoCell	0
Repl03	MoTwoCell	0
Repl03	MoTwoCell	0
Repl03	MoTwoCell	0
Repl03	MoTwoCell	0
Repl03	MoTwoCell	0
Repl03	MoTwoCell	0
Repl03	MoTwoCell	0
Repl03	MoTwoCell	0
Repl03	MoTwoCell	0
Repl03	MoTwoCell	0
Repl03	MoTwoCell	0
Repl03	MoTwoCell	1
Repl03	MoTwoCell	0
Repl03	MoTwoCell	0
Repl03	MoTwoCell	0
Repl03	MoTwoCell	0
Repl03	MoTwoCell	0
Repl03	MoTwoCell	0
Repl03	MoTwoCell	0
Repl03	MoTwoCell	0
Repl03	MoTwoCell	0
Repl03	MoTwoCell	0
Repl03	MoTwoCell	0
Repl03	MoTwoCell	1
Repl03	MoTwoCell	0
Repl03	MoTwoCell	0
Repl03	MoTwoCell	0
Repl03	MoTwoCell	0
Repl03	MoTwoCell	0
Repl03	MoTwoCell	0
Repl03	MoTwoCell	0
Repl03	MoTwoCell	0
Repl03	MoTwoCell	0
Repl03	MoTwoCell	0
Repl03	MoTwoCell	0
Repl03	MoTwoCell	0
Repl03	MoTwoCell	0
Repl03	MoTwoCell	0
Repl03	MoTwoCell	0
Repl03	MoTwoCell	0
Repl03	MoTwoCell	0
Repl03	MoTwoCell	1
Repl03	MoTwoCell	0
Repl03	MoTwoCell	0
Repl03	MoTwoCell	0
Repl03	MoTwoCell	0
Repl03	MoTwoCell	0
Repl03	MoTwoCell	0
Repl03	MoTwoCell	0
Repl03	MoTwoCell	0
Repl03	MoTwoCell	0
Repl03	MoTwoCell	0
Repl03	MoTwoCell	0
Repl03	MoTwoCell	0
Repl03	MoTwoCell	0
Repl03	MoTwoCell	0
Repl03	MoTwoCell	0
Repl03	MoTwoCell	0
Repl03	MoTwoCell	0
Repl03	MoTwoCell	1
Repl03	MoTwoCell	0
Repl03	MoTwoCell	0
Repl03	MoTwoCell	0
Repl03	MoTwoCell	0
Repl03	MoTwoCell	0
Repl03	MoTwoCell	0
Repl03	MoTwoCell	0
Repl03	MoTwoCell	0
Repl03	MoTwoCell	0
Repl03	MoTwoCell	0
Repl03	MoTwoCell	0
Repl03	MoTwoCell	0
Repl03	MoTwoCell	0
Repl03	MoTwoCell	0
Repl03	MoTwoCell	1
Repl03	MoTwoCell	0
Repl03	MoTwoCell	0
Repl03	MoTwoCell	0
Repl03	MoTwoCell	0
Repl03	MoTwoCell	0
Repl03	MoTwoCell	0
Repl03	MoTwoCell	0
Repl03	MoTwoCell	0
Repl03	MoTwoCell	0
Repl03	MoTwoCell	0
Repl03	MoTwoCell	0
Repl03	MoTwoCell	0
Repl03	MoTwoCell	0
Repl03	MoTwoCell	0
Repl03	MoTwoCell	0
Repl03	MoTwoCell	0
Repl03	MoTwoCell	0
Repl03	MoTwoCell	1
Repl03	MoTwoCell	0
Repl03	MoTwoCell	0
Repl03	MoTwoCell	0
Repl03	MoTwoCell	0
Repl03	MoTwoCell	0
Repl03	MoTwoCell	0
Repl03	MoTwoCell	0
Repl03	MoTwoCell	0
Repl03	MoTwoCell	0
Repl03	MoTwoCell	0
Repl03	MoTwoCell	0
Repl03	MoTwoCell	0
Repl03	MoTwoCell	0
Repl03	MoTwoCell	0
Repl03	MoTwoCell	0
Repl03	MoTwoCell	0
Repl03	MoTwoCell	0
Repl03	MoTwoCell	1
Repl03	MoTwoCell	0
Repl03	MoTwoCell	0
Repl03	MoTwoCell	0
Repl03	MoTwoCell	0
Repl03	MoTwoCell	0
Repl03	MoTwoCell	0
Repl03	MoTwoCell	0
Repl03	MoTwoCell	0
Repl03	MoTwoCell	0
Repl03	MoTwoCell	0
Repl03	MoTwoCell	0
Repl03	MoTwoCell	0
Repl03	MoTwoCell	0
Repl03	MoTwoCell	0
Repl03	MoTwoCell	1
Repl03	MoTwoCell	0
Repl03	MoTwoCell	0
Repl01	ZFMicplGhost	1
Repl01	ZFMicplGhost	2
Repl01	ZFMicplGhost	1
Repl01	ZFMicplGhost	1
Repl01	ZFMicplGhost	1
Repl01	ZFMicplGhost	1
Repl01	ZFMicplGhost	1
Repl01	ZFMicplGhost	0
Repl01	ZFMicplGhost	1
Repl01	ZFMicplGhost	0
Repl01	ZFMicplGhost	1
Repl01	ZFMicplGhost	0
Repl01	ZFMicplGhost	0
Repl01	ZFMicplGhost	1
Repl01	ZFMicplGhost	1
Repl01	ZFMicplGhost	1
Repl01	ZFMicplGhost	2
Repl01	ZFMicplGhost	1
Repl01	ZFMicplGhost	1
Repl01	ZFMicplGhost	2
Repl01	ZFMicplGhost	1
Repl01	ZFMicplGhost	1
Repl01	ZFMicplGhost	1
Repl01	ZFMicplGhost	2
Repl01	ZFMicplGhost	1
Repl01	ZFMicplGhost	1
Repl01	ZFMicplGhost	1
Repl01	ZFMicplGhost	1
Repl01	ZFMicplGhost	2
Repl01	ZFMicplGhost	0
Repl01	ZFMicplGhost	1
Repl01	ZFMicplGhost	0
Repl01	ZFMicplGhost	1
Repl01	ZFMicplGhost	1
Repl01	ZFMicplGhost	1
Repl01	ZFMicplGhost	1
Repl01	ZFMicplGhost	1
Repl01	ZFMicplGhost	2
Repl01	ZFMicplGhost	1
Repl01	ZFMicplGhost	1
Repl01	ZFMicplGhost	0
Repl02	ZFMicplGhost	0
Repl02	ZFMicplGhost	1
Repl02	ZFMicplGhost	0
Repl02	ZFMicplGhost	0
Repl02	ZFMicplGhost	0
Repl02	ZFMicplGhost	0
Repl02	ZFMicplGhost	1
Repl02	ZFMicplGhost	2
Repl02	ZFMicplGhost	1
Repl02	ZFMicplGhost	1
Repl02	ZFMicplGhost	1
Repl02	ZFMicplGhost	1
Repl02	ZFMicplGhost	0
Repl02	ZFMicplGhost	1
Repl02	ZFMicplGhost	1
Repl02	ZFMicplGhost	0
Repl02	ZFMicplGhost	1
Repl02	ZFMicplGhost	1
Repl02	ZFMicplGhost	0
Repl02	ZFMicplGhost	1
Repl02	ZFMicplGhost	1
Repl02	ZFMicplGhost	1
Repl02	ZFMicplGhost	1
Repl02	ZFMicplGhost	2
Repl02	ZFMicplGhost	2
Repl02	ZFMicplGhost	0
Repl02	ZFMicplGhost	0
Repl02	ZFMicplGhost	0
Repl02	ZFMicplGhost	1
Repl02	ZFMicplGhost	2
Repl02	ZFMicplGhost	0
Repl02	ZFMicplGhost	2
Repl02	ZFMicplGhost	3
Repl02	ZFMicplGhost	3
Repl02	ZFMicplGhost	3
Repl02	ZFMicplGhost	2
Repl02	ZFMicplGhost	0
Repl02	ZFMicplGhost	0
Repl02	ZFMicplGhost	1
Repl02	ZFMicplGhost	1
Repl02	ZFMicplGhost	1
Repl03	ZFMicplGhost	0
Repl03	ZFMicplGhost	0
Repl03	ZFMicplGhost	0
Repl03	ZFMicplGhost	0
Repl03	ZFMicplGhost	0
Repl03	ZFMicplGhost	0
Repl03	ZFMicplGhost	0
Repl03	ZFMicplGhost	0
Repl03	ZFMicplGhost	0
Repl03	ZFMicplGhost	0
Repl03	ZFMicplGhost	0
Repl03	ZFMicplGhost	0
Repl03	ZFMicplGhost	1
Repl03	ZFMicplGhost	1
Repl03	ZFMicplGhost	0
Repl03	ZFMicplGhost	1
Repl03	ZFMicplGhost	0
Repl03	ZFMicplGhost	0
Repl03	ZFMicplGhost	1
Repl03	ZFMicplGhost	0
Repl03	ZFMicplGhost	0
Repl03	ZFMicplGhost	0
Repl03	ZFMicplGhost	1
Repl03	ZFMicplGhost	2
Repl03	ZFMicplGhost	2
Repl03	ZFMicplGhost	1
Repl03	ZFMicplGhost	2
Repl03	ZFMicplGhost	1
Repl03	ZFMicplGhost	1
Repl03	ZFMicplGhost	1
Repl03	ZFMicplGhost	1
Repl03	ZFMicplGhost	4
Repl03	ZFMicplGhost	4
Repl03	ZFMicplGhost	4
Repl03	ZFMicplGhost	2
Repl03	ZFMicplGhost	1
Repl03	ZFMicplGhost	3
Repl03	ZFMicplGhost	1
Repl03	ZFMicplGhost	4
	MoTwoCell	0
	MoTwoCell	0
	MoTwoCell	0
	MoTwoCell	0
	MoTwoCell	0
	MoTwoCell	0
	MoTwoCell	0
	MoTwoCell	0
	MoTwoCell	0
	MoTwoCell	0
	MoTwoCell	0
	MoTwoCell	0
	MoTwoCell	0
	MoTwoCell	0
	MoTwoCell	0
	MoTwoCell	0
	MoTwoCell	0
	MoTwoCell	0
	MoTwoCell	0
	MoTwoCell	0
	MoTwoCell	0
	MoTwoCell	0
	MoTwoCell	0
	MoTwoCell	1
	MoTwoCell	0
	MoTwoCell	0
	MoTwoCell	0
	MoTwoCell	0
	MoTwoCell	0
	MoTwoCell	0
	MoTwoCell	0
	MoTwoCell	0
	MoTwoCell	0
	MoTwoCell	0
	MoTwoCell	0
	MoTwoCell	0
	MoTwoCell	0
	MoTwoCell	0
	MoTwoCell	0
	MoTwoCell	0
	MoTwoCell	0
	MoTwoCell	0
	MoTwoCell	0
	MoTwoCell	0
	MoTwoCell	0
	MoTwoCell	0
	MoTwoCell	0
	MoTwoCell	0
	MoTwoCell	0
	MoTwoCell	0
	MoTwoCell	0
	MoTwoCell	0
	MoTwoCell	0
	MoTwoCell	2
	MoTwoCell	0
	MoTwoCell	0
	MoTwoCell	0
	MoTwoCell	0
	MoTwoCell	0
	MoTwoCell	0
	MoTwoCell	0
	MoTwoCell	0
	MoTwoCell	0
	MoTwoCell	0
	MoTwoCell	0
	MoTwoCell	1
	MoTwoCell	0
	MoTwoCell	0
	MoTwoCell	0
	MoTwoCell	0
	MoTwoCell	0
	MoTwoCell	0
	MoTwoCell	0
	MoTwoCell	0
	MoTwoCell	0
	MoTwoCell	0
	MoTwoCell	0
	MoTwoCell	1
	MoTwoCell	0
	MoTwoCell	0
	MoTwoCell	0
	MoTwoCell	0
	MoTwoCell	0
	MoTwoCell	0
	MoTwoCell	0
	MoTwoCell	0
	MoTwoCell	0
	MoTwoCell	0
	MoTwoCell	0
	MoTwoCell	0
	MoTwoCell	0
	MoTwoCell	0
	MoTwoCell	0
	MoTwoCell	0
	MoTwoCell	0
	MoTwoCell	1
	MoTwoCell	0
	MoTwoCell	0
	MoTwoCell	0
	MoTwoCell	0
	MoTwoCell	0
	MoTwoCell	0
	MoTwoCell	0
	MoTwoCell	0
	MoTwoCell	0
	MoTwoCell	0
	MoTwoCell	0
	MoTwoCell	0
	MoTwoCell	0
	MoTwoCell	0
	MoTwoCell	1
	MoTwoCell	0
	MoTwoCell	0
	MoTwoCell	0
	MoTwoCell	0
	MoTwoCell	0
	MoTwoCell	0
	MoTwoCell	0
	MoTwoCell	0
	MoTwoCell	0
	MoTwoCell	0
	MoTwoCell	0
	MoTwoCell	0
	MoTwoCell	0
	MoTwoCell	0
	MoTwoCell	0
	MoTwoCell	0
	MoTwoCell	0
	MoTwoCell	0
	MoTwoCell	0
	MoTwoCell	0
	MoTwoCell	0
	MoTwoCell	0
	MoTwoCell	0
	MoTwoCell	0
	MoTwoCell	0
	MoTwoCell	0
	MoTwoCell	0
	MoTwoCell	0
	MoTwoCell	0
	MoTwoCell	0
	MoTwoCell	0
	MoTwoCell	0
	MoTwoCell	0
	MoTwoCell	0
	MoTwoCell	0
	MoTwoCell	0
	MoTwoCell	0
	MoTwoCell	0
	MoTwoCell	0
	MoTwoCell	1
	MoTwoCell	0
	MoTwoCell	0
	MoTwoCell	0
	MoTwoCell	0
	MoTwoCell	0
	MoTwoCell	0
	MoTwoCell	0
	MoTwoCell	0
	MoTwoCell	0
	MoTwoCell	0
	MoTwoCell	0
	MoTwoCell	0
	MoTwoCell	0
	MoTwoCell	0
	MoTwoCell	0
	MoTwoCell	0
	MoTwoCell	0
	MoTwoCell	0
	MoTwoCell	0
	MoTwoCell	0
	MoTwoCell	0
	MoTwoCell	0
	MoTwoCell	0
	MoTwoCell	0
	MoTwoCell	0
	MoTwoCell	0
	MoTwoCell	0
	MoTwoCell	0
	MoTwoCell	0
	MoTwoCell	0
	MoTwoCell	0
	MoTwoCell	0
	MoTwoCell	0
	MoTwoCell	0
	MoTwoCell	0
	MoTwoCell	0
	MoTwoCell	0
	MoTwoCell	0
	MoTwoCell	0
	MoTwoCell	0
	MoTwoCell	0
	MoTwoCell	0
	MoTwoCell	1
	MoTwoCell	0
	MoTwoCell	0
	MoTwoCell	0
	MoTwoCell	0
	MoTwoCell	0
	MoTwoCell	0
	MoTwoCell	0
	MoTwoCell	0
	MoTwoCell	0
	MoTwoCell	0
	MoTwoCell	0
	MoTwoCell	0
	MoTwoCell	0
	MoTwoCell	0
	MoTwoCell	0
	MoTwoCell	0
	MoTwoCell	0
	MoTwoCell	0
	MoTwoCell	0
	MoTwoCell	0
	MoTwoCell	0
	MoTwoCell	0
	MoTwoCell	0
	MoTwoCell	0
	MoTwoCell	0
	MoTwoCell	0
	MoTwoCell	0
	MoTwoCell	0
	MoTwoCell	0
	MoTwoCell	0
	MoTwoCell	0
	MoTwoCell	0
	MoTwoCell	0
	MoTwoCell	0
	MoTwoCell	0
	MoTwoCell	0
	MoTwoCell	0
	MoTwoCell	0
	MoTwoCell	0
	MoTwoCell	0
	MoTwoCell	0
	MoTwoCell	0
	MoTwoCell	0
	MoTwoCell	0
	MoTwoCell	0
	MoTwoCell	2
	MoTwoCell	0
	MoTwoCell	0
	MoTwoCell	0
	MoTwoCell	0
	MoTwoCell	0
	MoTwoCell	0
	MoTwoCell	0
	MoTwoCell	0
	MoTwoCell	0
	MoTwoCell	0
	MoTwoCell	0
	MoTwoCell	0
	MoTwoCell	0
	MoTwoCell	0
	MoTwoCell	0
	MoTwoCell	0
	MoTwoCell	0
	MoTwoCell	0
	MoTwoCell	0
	MoTwoCell	0
	MoTwoCell	0
	MoTwoCell	0
	MoTwoCell	0
	MoTwoCell	0
	MoTwoCell	0
	MoTwoCell	0
	MoTwoCell	0
	MoTwoCell	0
	MoTwoCell	0
	MoTwoCell	0
	MoTwoCell	0
	MoTwoCell	0
	MoTwoCell	0
	MoTwoCell	0
	MoTwoCell	0
	MoTwoCell	0
	MoTwoCell	0
	MoTwoCell	0
	MoTwoCell	0
	MoTwoCell	0
	MoTwoCell	0
	MoTwoCell	0
	MoTwoCell	0
	MoTwoCell	0
	MoTwoCell	0
	MoTwoCell	0
	MoTwoCell	0
	MoTwoCell	1
	MoTwoCell	0
	MoTwoCell	0
	MoTwoCell	0
	MoTwoCell	0
	MoTwoCell	0
	MoTwoCell	0
	MoTwoCell	0
	MoTwoCell	0
	MoTwoCell	0
	MoTwoCell	0
	MoTwoCell	0
	MoTwoCell	0
	MoTwoCell	0
	MoTwoCell	0
	MoTwoCell	0
	MoTwoCell	0
	MoTwoCell	0
	MoTwoCell	0
	MoTwoCell	0
	MoTwoCell	0
	MoTwoCell	0
	MoTwoCell	0
	MoTwoCell	0
	MoTwoCell	0
	MoTwoCell	0
	ZFMicplGhost	2
	ZFMicplGhost	2
	ZFMicplGhost	3
	ZFMicplGhost	4
	ZFMicplGhost	4
	ZFMicplGhost	2
	ZFMicplGhost	1
	ZFMicplGhost	0
	ZFMicplGhost	1
	ZFMicplGhost	0
	ZFMicplGhost	1
	ZFMicplGhost	0
	ZFMicplGhost	0
	ZFMicplGhost	2
	ZFMicplGhost	2
	ZFMicplGhost	3
	ZFMicplGhost	2
	ZFMicplGhost	3
	ZFMicplGhost	3
	ZFMicplGhost	2
	ZFMicplGhost	1
	ZFMicplGhost	1
	ZFMicplGhost	1
	ZFMicplGhost	2
	ZFMicplGhost	1
	ZFMicplGhost	3
	ZFMicplGhost	2
	ZFMicplGhost	3
	ZFMicplGhost	2
	ZFMicplGhost	0
	ZFMicplGhost	2
	ZFMicplGhost	0
	ZFMicplGhost	1
	ZFMicplGhost	3
	ZFMicplGhost	3
	ZFMicplGhost	4
	ZFMicplGhost	2
	ZFMicplGhost	2
	ZFMicplGhost	1
	ZFMicplGhost	1
	ZFMicplGhost	0
	ZFMicplGhost	0
	ZFMicplGhost	1
	ZFMicplGhost	0
	ZFMicplGhost	0
	ZFMicplGhost	0
	ZFMicplGhost	0
	ZFMicplGhost	2
	ZFMicplGhost	2
	ZFMicplGhost	3
	ZFMicplGhost	3
	ZFMicplGhost	3
	ZFMicplGhost	3
	ZFMicplGhost	0
	ZFMicplGhost	1
	ZFMicplGhost	1
	ZFMicplGhost	0
	ZFMicplGhost	4
	ZFMicplGhost	3
	ZFMicplGhost	0
	ZFMicplGhost	1
	ZFMicplGhost	1
	ZFMicplGhost	1
	ZFMicplGhost	1
	ZFMicplGhost	2
	ZFMicplGhost	2
	ZFMicplGhost	0
	ZFMicplGhost	0
	ZFMicplGhost	0
	ZFMicplGhost	1
	ZFMicplGhost	2
	ZFMicplGhost	0
	ZFMicplGhost	2
	ZFMicplGhost	3
	ZFMicplGhost	3
	ZFMicplGhost	3
	ZFMicplGhost	4
	ZFMicplGhost	0
	ZFMicplGhost	0
	ZFMicplGhost	1
	ZFMicplGhost	1
	ZFMicplGhost	1
	ZFMicplGhost	0
	ZFMicplGhost	0
	ZFMicplGhost	0
	ZFMicplGhost	0
	ZFMicplGhost	0
	ZFMicplGhost	0
	ZFMicplGhost	0
	ZFMicplGhost	0
	ZFMicplGhost	0
	ZFMicplGhost	0
	ZFMicplGhost	0
	ZFMicplGhost	0
	ZFMicplGhost	1
	ZFMicplGhost	1
	ZFMicplGhost	0
	ZFMicplGhost	4
	ZFMicplGhost	0
	ZFMicplGhost	0
	ZFMicplGhost	4
	ZFMicplGhost	0
	ZFMicplGhost	0
	ZFMicplGhost	0
	ZFMicplGhost	1
	ZFMicplGhost	2
	ZFMicplGhost	2
	ZFMicplGhost	3
	ZFMicplGhost	2
	ZFMicplGhost	3
	ZFMicplGhost	2
	ZFMicplGhost	2
	ZFMicplGhost	1
	ZFMicplGhost	4
	ZFMicplGhost	4
	ZFMicplGhost	4
	ZFMicplGhost	2
	ZFMicplGhost	1
	ZFMicplGhost	3
	ZFMicplGhost	1
	ZFMicplGhost	4

## Sheet: Fig_3D
RID (*10000)
Eggs	POSA	POSB	POSC	POSD	POSE	POSF	POSG	POSH	POSI	POSJ	POSK	POSL	POSM	POSN	POSO
Egg01	1.02	1.17	1.69	2.35	2.69	2.36	5.92	11.28	10.95	7.57	4.04	3.54	2.31	2.36	1.01
Egg02	0.99	1.34	1.7	2.35	2.7	3.04	5.89	27.64	12.98	7.44	2.36	3.38	4.72	1.51	1
Egg03	1.03	1.22	2.03	2.35	2.69	4.01	13.15	7.92	26.97	7.45	4.06	2.68	2.88	1.5	0.98
Egg04	1.04	1.19	1.68	2.33	2.7	7.42	5.84	11.3	4.55	7.1	4.02	2.73	1.36	1.02	1.02
Egg05	1.01	1.17	1.73	2.34	2.02	4.03	6.39	13.99	13.79	7.1	4.03	1.01	1.71	0.99	0.99
Egg06	1	1.15	1.65	1.35	2.72	3.02	6.39	14.03	13.02	3.37	4.04	2.7	2.4	1.1	1.01
Egg07	0.98	1.24	1.68	2.35	2.69	4.04	5.9	9.29	10.96	7.09	4.06	1.71	2.38	0.97	1
Egg08	1	1.23	1.69	2.37	2.72	2.94	5.89	11.33	13.81	7.43	4	2.73	1.73	0.99	1
Egg09	1.03	1.19	1.73	2.7	4.38	3.05	5.87	9.27	13.82	7.57	4.05	2.68	2.88	1.52	1.02
Egg10	0.97	1.2	1.69	2.33	2.73	3.03	6.41	13.98	10.98	7.57	9.94	1.68	2.84	0.84	0.99
Number of sperm per um2 per position
Eggs	POSA	POSB	POSC	POSD	POSE	POSF	POSG	POSH	POSI	POSJ	POSK	POSL	POSM	POSN	POSO
Egg01	0	0	0	0	1	2	2	4	4	1	1	0	0	0	0
Egg02	0	0	0	0	1	1	1	2	2	0	0	0	0	0	0
Egg03	0	0	0	0	1	1	2	5	6	2	1	0	0	0	0
Egg04	0	0	1	1	2	2	3	4	5	2	2	0	1	0	0
Egg05	0	0	0	1	1	2	2	5	4	2	2	0	1	0	0
Egg06	0	0	0	1	1	2	2	4	4	1	1	1	0	0	0
Egg07	0	0	1	0	1	1	2	7	5	2	1	1	1	0	0
Egg08	0	0	0	1	2	2	3	6	5	1	1	0	1	0	0
Egg09	0	0	0	0	1	1	2	5	4	2	1	0	0	0	0
Egg10	0	0	1	0	1	2	3	6	6	3	1	1	1	0	0
Legend
Position of fluorescence measurement on chorion to the left or right of the micropyle opening	Microns from micropyle opening
POSA	160	to the left
POSB	140	to the left
POSC	120	to the left
POSD	100	to the left
POSE	80	to the left
POSF	60	to the left
POSG	40	Micropyle area
POSH	20	Around the micropyle opening
POSI	40	Micropyle area
POSJ	60	to the right
POSK	80	to the right
POSL	100	to the right
POSM	120	to the right
POSN	140	to the right
POSO	160	to the right

## Sheet: Fig_4B
Replicates	Region	SpermNumber
Repl01	Micropyle	2
Repl01	Micropyle	4
Repl01	Micropyle	2
Repl01	Micropyle	1
Repl01	Micropyle	1
Repl01	Micropyle	1
Repl01	Micropyle	7
Repl01	Micropyle	1
Repl01	Micropyle	1
Repl01	Micropyle	3
Repl01	Micropyle	3
Repl01	Micropyle	2
Repl01	Micropyle	1
Repl01	Micropyle	1
Repl01	Micropyle	2
Repl01	Micropyle	1
Repl01	Micropyle	5
Repl02	Micropyle	2
Repl02	Micropyle	3
Repl02	Micropyle	4
Repl02	Micropyle	2
Repl02	Micropyle	1
Repl02	Micropyle	1
Repl02	Micropyle	2
Repl02	Micropyle	1
Repl02	Micropyle	1
Repl02	Micropyle	6
Repl02	Micropyle	1
Repl02	Micropyle	2
Repl02	Micropyle	3
Repl02	Micropyle	8
Repl02	Micropyle	2
Repl02	Micropyle	1
Repl02	Micropyle	2
Repl03	Micropyle	2
Repl03	Micropyle	12
Repl03	Micropyle	19
Repl03	Micropyle	4
Repl03	Micropyle	2
Repl03	Micropyle	2
Repl03	Micropyle	14
Repl03	Micropyle	15
Repl03	Micropyle	8
Repl03	Micropyle	2
Repl03	Micropyle	21
Repl03	Micropyle	10
Repl03	Micropyle	11
Repl03	Micropyle	6
Repl03	Micropyle	1
Repl03	Micropyle	5
Repl03	Micropyle	16
Repl03	Micropyle	12
Repl03	Micropyle	1
Repl01	Away	2
Repl01	Away	2
Repl01	Away	3
Repl01	Away	1
Repl01	Away	1
Repl01	Away	1
Repl01	Away	2
Repl01	Away	2
Repl01	Away	1
Repl01	Away	1
Repl01	Away	1
Repl01	Away	1
Repl01	Away	1
Repl01	Away	1
Repl01	Away	1
Repl01	Away	2
Repl01	Away	1
Repl02	Away	1
Repl02	Away	1
Repl02	Away	1
Repl02	Away	1
Repl02	Away	1
Repl02	Away	1
Repl02	Away	2
Repl02	Away	1
Repl02	Away	2
Repl02	Away	2
Repl02	Away	1
Repl02	Away	2
Repl02	Away	1
Repl02	Away	1
Repl02	Away	1
Repl02	Away	6
Repl02	Away	5
Repl03	Away	1
Repl03	Away	2
Repl03	Away	1
Repl03	Away	1
Repl03	Away	1
Repl03	Away	2
Repl03	Away	1
Repl03	Away	3
Repl03	Away	2
Repl03	Away	1
Repl03	Away	1
Repl03	Away	1
Repl03	Away	1
Repl03	Away	1
Repl03	Away	1
Repl03	Away	2
Repl03	Away	5
Repl03	Away	9
Repl03	Away	4
Repl03	Away	2
Repl03	Away	2

## Sheet: Fig_4E
Replicates	Position	AI_Egg01	AI_Egg02	AI_Egg03	AI_Egg04	AI_Egg05	AI_Egg06	AI_Egg07	AI_Egg08	AI_Egg09	AI_Egg10	AR_Egg01	AR_Egg02	AR_Egg03	AR_Egg04	AR_Egg05	AR_Egg06	AR_Egg07	AR_Egg08	AR_Egg09	AR_Egg10
Repl01	A	0	0	0	0	0	0	0	0	0	0	0	0	0	0	0	0	0	0	0	1
Repl02	A	0	0	0	0	0	0	0	0	0	0	0	0	0	1	0	0	0	0	0	0
Repl03	A	0	0	0	0	0	0	0	0	0	0	0	0	0	0	0	0	1	0	0	0
Repl01	B	0	1	1	1	1	0	1	0	0	0	1	0	0	0	0	0	0	0	0	0
Repl02	B	0	0	0	1	1	1	0	1	0	1	0	0	0	0	0	1	0	0	0	0
Repl03	B	0	1	0	1	1	1	0	1	0	0	0	0	0	0	1	0	0	0	0	0
Repl01	C	0	0	0	0	0	0	0	0	0	1	0	0	0	0	1	0	0	0	0	0
Repl02	C	0	0	1	0	0	0	0	0	0	0	0	0	0	0	0	0	1	0	0	0
Repl03	C	0	0	1	0	0	0	0	0	0	0	0	0	0	0	0	1	0	0	0	0
Repl01	D	2	0	0	0	0	0	0	0	0	0	0	0	0	0	0	0	0	0	0	1
Repl02	D	2	0	0	0	0	0	0	0	0	0	0	1	0	0	0	0	0	0	0	0
Repl03	D	0	0	0	0	0	0	0	0	0	2	0	1	0	0	0	0	0	0	0	0
Repl01	E	1	0	0	1	0	0	0	2	0	1	0	0	0	0	0	0	0	2	0	0
Repl02	E	2	0	0	0	1	0	0	1	1	0	0	0	0	0	2	0	0	0	0	0
Repl03	E	0	0	2	0	1	0	0	1	1	0	0	0	0	0	2	0	0	0	0	0
Repl01	F	2	0	1	1	1	0	0	0	0	0	0	0	0	0	3	1	1	0	0	1
Repl02	F	0	0	0	1	1	0	1	0	0	2	1	0	3	0	1	0	0	1	0	0
Repl03	F	0	1	0	0	2	0	1	0	1	0	0	0	1	1	0	0	1	0	3	0
Repl01	G	0	1	0	2	1	1	2	1	3	0	0	0	1	3	0	0	1	1	0	0
Repl02	G	0	0	3	1	2	1	0	1	2	1	0	1	1	0	0	3	0	1	0	0
Repl03	G	0	1	0	1	2	1	3	2	0	1	0	0	0	0	1	3	1	0	0	1
Repl01	H	3	2	2	3	3	2	2	3	2	2	0	3	2	1	2	1	3	0	3	0
Repl02	H	3	2	2	3	2	2	2	2	3	3	3	0	0	1	1	2	2	0	3	3
Repl03	H	3	3	2	2	2	3	2	3	2	2	0	2	3	1	3	0	0	3	2	1
Repl01	I	0	1	0	1	3	1	0	2	2	2	1	1	3	0	0	0	0	0	1	0
Repl02	I	1	0	3	1	2	2	2	1	0	0	0	0	3	0	0	0	0	1	1	1
Repl03	I	1	1	2	0	2	0	0	3	1	2	0	1	1	0	0	0	3	0	0	1
Repl01	J	2	0	1	1	0	0	1	0	0	0	0	0	0	1	0	0	0	0	0	0
Repl02	J	0	0	0	1	2	0	1	1	0	0	0	0	0	0	1	0	0	0	0	0
Repl03	J	0	0	1	0	1	0	0	1	0	2	0	0	0	0	0	0	1	0	0	0
Repl01	K	0	0	0	1	0	0	0	0	0	0	0	0	0	0	0	0	0	0	1	0
Repl02	K	0	0	0	0	0	0	1	0	0	0	0	0	0	0	1	0	0	0	0	0
Repl03	K	0	1	0	0	0	0	0	0	0	0	0	0	0	1	0	0	0	0	0	0
Repl01	L	0	0	0	0	0	1	0	0	0	0	0	0	0	0	0	0	0	0	1	0
Repl02	L	1	0	0	0	0	0	0	0	0	0	0	1	0	0	0	0	0	0	0	0
Repl03	L	0	0	0	1	0	0	0	0	0	0	0	1	0	0	0	0	0	0	0	0
Repl01	M	0	0	0	0	0	0	0	0	0	0	0	0	0	0	0	0	0	0	0	0
Repl02	M	0	0	0	0	0	0	0	0	0	0	0	0	0	0	0	0	0	0	0	0
Repl03	M	0	0	0	0	0	0	0	0	0	0	0	0	0	0	0	0	0	0	0	0
Repl01	N	0	0	0	0	0	0	0	0	0	0	0	0	0	0	0	0	0	0	0	0
Repl02	N	0	0	0	0	0	0	0	0	0	0	0	0	0	0	0	0	0	0	0	0
Repl03	N	0	0	0	0	0	0	0	0	0	0	0	0	0	0	0	0	0	0	0	0
Repl01	O	0	0	0	0	0	0	0	0	0	0	0	0	0	0	0	0	0	0	0	0
Repl02	O	0	0	0	0	0	0	0	0	0	0	0	0	0	0	0	0	0	0	0	0
Repl03	O	0	0	0	0	0	0	0	0	0	0	0	0	0	0	0	0	0	0	0	0
Legend
Position of fluorescence measurement on chorion to the left or right of the micropyle opening	Microns from micropyle opening
POSA	160	to the left
POSB	140	to the left
POSC	120	to the left
POSD	100	to the left
POSE	80	to the left
POSF	60	to the left
POSG	40	Micropyle area
POSH	20	Around the micropyle opening
POSI	40	Micropyle area
POSJ	60	to the right
POSK	80	to the right
POSL	100	to the right
POSM	120	to the right
POSN	140	to the right
POSO	160	to the right

## Sheet: Fig_5B
Replicates	Genotype	SpermNumb
Repl01	CatSper1Het	62
Repl01	CatSper1Het	71
Repl01	CatSper1Het	68
Repl01	CatSper1Het	63
Repl02	CatSper1Het	70
Repl02	CatSper1Het	69
Repl02	CatSper1Het	61
Repl03	CatSper1Het	62
Repl03	CatSper1Het	69
Repl03	CatSper1Het	70
Repl01	CatSper1KO	69
Repl01	CatSper1KO	62
Repl01	CatSper1KO	36
Repl01	CatSper1KO	64
Repl02	CatSper1KO	44
Repl02	CatSper1KO	68
Repl02	CatSper1KO	66
Repl03	CatSper1KO	61
Repl03	CatSper1KO	70
Repl03	CatSper1KO	62
							CatSper1Het	4.08	1.56623
							CatSper1KO	0	0

[truncated: 2 more sheets: Fig_5D, Fig_5F]
